# Supplementary material for: Effects of Anti-Integrin Treatment With Vedolizumab on Immune Pathways and Cytokines in Inflammatory Bowel Diseases
Source: Front Immunol. 2018 Jul 31;9:1700. doi: 10.3389/fimmu.2018.01700 (PMC6090141; doi:10.3389/fimmu.2018.01700)
Supplement: Table S3 — CD Non-Remitter Genes before and after VDZ. [file Table_3.xls]

## Sheet: CD_nonresp_after_vs_before
ensembl	hgnc_symbol	description	baseMean	log2FoldChange	lfcSE	stat	pvalue	padj
ENSG00000250591	PRSS3P1	protease, serine, 3 pseudogene 1 [Source:HGNC Symbol;Acc:43787]	793.155	11.2783	2.86307	3.93922	8.1747e-05	0.0113299
ENSG00000250606	PRSS3P2	protease, serine, 3 pseudogene 2 [Source:HGNC Symbol;Acc:43788]	967.807	10.7045	2.63704	4.0593	4.92195e-05	0.00811778
ENSG00000110244	APOA4	apolipoprotein A-IV [Source:HGNC Symbol;Acc:602]	6549.34	10.5661	2.41447	4.37614	1.20797e-05	0.00292986
ENSG00000114771	AADAC	arylacetamide deacetylase [Source:HGNC Symbol;Acc:17]	222.901	8.8619	2.78371	3.18349	0.00145512	0.0683742
ENSG00000130700	GATA5	GATA binding protein 5 [Source:HGNC Symbol;Acc:15802]	205.914	8.68014	3.24227	2.67718	0.00742454	0.14789
ENSG00000204978	C19orf69	chromosome 19 open reading frame 69 [Source:HGNC Symbol;Acc:34497]	129.123	8.67891	2.79302	3.10736	0.00188765	0.0786189
ENSG00000183019	C19orf59	chromosome 19 open reading frame 59 [Source:HGNC Symbol;Acc:27291]	120.527	8.57813	1.14945	7.4628	8.47003e-14	6.6522e-11
ENSG00000167780	SOAT2	sterol O-acyltransferase 2 [Source:HGNC Symbol;Acc:11178]	18.928	8.27834	2.22439	3.72162	0.000197949	0.0194331
ENSG00000108576	SLC6A4	solute carrier family 6 (neurotransmitter transporter), member 4 [Source:HGNC Symbol;Acc:11050]	188.448	8.17465	1.75619	4.65477	3.24341e-06	0.000955242
ENSG00000247699			24.4186	8.16278	2.30877	3.53556	0.000406917	0.0305058
ENSG00000198569	SLC34A3	solute carrier family 34 (type II sodium/phosphate contransporter), member 3 [Source:HGNC Symbol;Acc:20305]	19.0335	7.80256	2.17941	3.58012	0.000343431	0.0284277
ENSG00000125255	SLC10A2	solute carrier family 10 (sodium/bile acid cotransporter), member 2 [Source:HGNC Symbol;Acc:10906]	643.285	7.72607	2.58531	2.98845	0.00280396	0.0975647
ENSG00000129988	LBP	lipopolysaccharide binding protein [Source:HGNC Symbol;Acc:6517]	19.7552	7.70468	2.07871	3.70646	0.000210173	0.0201534
ENSG00000239839	DEFA3	defensin, alpha 3, neutrophil-specific [Source:HGNC Symbol;Acc:2762]	10.4644	7.62601	2.21941	3.43606	0.000590249	NA
ENSG00000105664	COMP	cartilage oligomeric matrix protein [Source:HGNC Symbol;Acc:2227]	14.4643	7.51444	2.58258	2.90967	0.00361815	NA
ENSG00000172016	REG3A	regenerating islet-derived 3 alpha [Source:HGNC Symbol;Acc:8601]	37340	7.49715	1.85728	4.03663	5.42241e-05	0.00851732
ENSG00000259600			48.3282	7.39095	1.72468	4.28542	1.82398e-05	0.00401105
ENSG00000159263	SIM2	single-minded family bHLH transcription factor 2 [Source:HGNC Symbol;Acc:10883]	4.78299	7.36394	2.85396	2.58026	0.00987272	NA
ENSG00000216588	IGSF23	immunoglobulin superfamily, member 23 [Source:HGNC Symbol;Acc:40040]	13.2422	6.79477	2.33519	2.90973	0.00361742	NA
ENSG00000156222	SLC28A1	solute carrier family 28 (concentrative nucleoside transporter), member 1 [Source:HGNC Symbol;Acc:11001]	56.9474	6.7402	1.6646	4.04915	5.14036e-05	0.00831372
ENSG00000154646	TMPRSS15	transmembrane protease, serine 15 [Source:HGNC Symbol;Acc:9490]	191.196	6.68495	2.56953	2.60162	0.00927847	0.162452
ENSG00000169903	TM4SF4	transmembrane 4 L six family member 4 [Source:HGNC Symbol;Acc:11856]	217.77	6.62496	1.67203	3.96223	7.42541e-05	0.0107379
ENSG00000259671			58.3766	6.58982	1.37015	4.80955	1.51272e-06	0.000470742
ENSG00000010932	FMO1	flavin containing monooxygenase 1 [Source:HGNC Symbol;Acc:3769]	34.4536	6.57723	1.79979	3.65445	0.000257734	0.0236156
ENSG00000115386	REG1A	regenerating islet-derived 1 alpha [Source:HGNC Symbol;Acc:9951]	105238	6.55578	1.71495	3.82272	0.000131989	0.0149102
ENSG00000138075	ABCG5	ATP-binding cassette, sub-family G (WHITE), member 5 [Source:HGNC Symbol;Acc:13886]	55.471	6.23574	2.36706	2.63438	0.00842906	0.156908
ENSG00000204983	PRSS1	protease, serine, 1 (trypsin 1) [Source:HGNC Symbol;Acc:9475]	2414.58	6.10306	2.08577	2.92605	0.00343293	0.105436
ENSG00000159167	STC1	stanniocalcin 1 [Source:HGNC Symbol;Acc:11373]	324.549	5.932	1.60677	3.69187	0.000222608	0.0211004
ENSG00000182782	HCAR2	hydroxycarboxylic acid receptor 2 [Source:HGNC Symbol;Acc:24827]	438.808	5.73962	1.91887	2.99115	0.00277927	0.0975647
ENSG00000172023	REG1B	regenerating islet-derived 1 beta [Source:HGNC Symbol;Acc:9952]	27639.8	5.67429	2.14179	2.64933	0.00806526	0.154465
ENSG00000257335	MGAM	maltase-glucoamylase (alpha-glucosidase) [Source:HGNC Symbol;Acc:7043]	1776.09	5.44927	1.46335	3.72384	0.000196217	0.0194331
ENSG00000163421	PROK2	prokineticin 2 [Source:HGNC Symbol;Acc:18455]	421.456	5.32136	1.94517	2.73568	0.00622521	0.137815
ENSG00000164509	IL31RA	interleukin 31 receptor A [Source:HGNC Symbol;Acc:18969]	10.0579	5.30491	1.79382	2.95733	0.00310315	NA
ENSG00000166523	CLEC4E	C-type lectin domain family 4, member E [Source:HGNC Symbol;Acc:14555]	247.146	5.27826	1.75429	3.00877	0.00262307	0.0955586
ENSG00000164816	DEFA5	defensin, alpha 5, Paneth cell-specific [Source:HGNC Symbol;Acc:2764]	80595.5	5.26187	1.76025	2.98928	0.00279637	0.0975647
ENSG00000180818	HOXC10	homeobox C10 [Source:HGNC Symbol;Acc:5122]	17.6585	5.25112	1.89086	2.7771	0.00548456	0.129409
ENSG00000163464	CXCR1	chemokine (C-X-C motif) receptor 1 [Source:HGNC Symbol;Acc:6026]	442.28	5.19407	1.29265	4.01816	5.86533e-05	0.00895712
ENSG00000237803	LINC00211	long intergenic non-protein coding RNA 211 [Source:HGNC Symbol;Acc:37459]	5.49559	5.1514	1.86422	2.7633	0.00572204	NA
ENSG00000196549	MME	membrane metallo-endopeptidase [Source:HGNC Symbol;Acc:7154]	932.876	5.14156	1.01302	5.07548	3.86516e-07	0.000135634
ENSG00000223722			13.3724	5.10332	1.45464	3.50831	0.000450963	NA
ENSG00000081800	SLC13A1	solute carrier family 13 (sodium/sulfate symporter), member 1 [Source:HGNC Symbol;Acc:10916]	25.6529	5.08705	1.51231	3.36376	0.000768891	0.0455921
ENSG00000107984	DKK1	dickkopf WNT signaling pathway inhibitor 1 [Source:HGNC Symbol;Acc:2891]	18.2213	5.01639	1.7185	2.91906	0.0035109	0.106245
ENSG00000131015	ULBP2	UL16 binding protein 2 [Source:HGNC Symbol;Acc:14894]	6.15029	4.99261	1.93694	2.57757	0.00994965	NA
ENSG00000102802	MEDAG	mesenteric estrogen-dependent adipogenesis [Source:HGNC Symbol;Acc:25926]	56.6867	4.91845	0.910178	5.40383	6.52336e-08	2.62414e-05
ENSG00000197977	ELOVL2	ELOVL fatty acid elongase 2 [Source:HGNC Symbol;Acc:14416]	17.3669	4.90325	1.6652	2.94453	0.00323442	0.104185
ENSG00000180447	GAS1	growth arrest-specific 1 [Source:HGNC Symbol;Acc:4165]	174.44	4.85516	1.29525	3.74844	0.000177941	0.0182284
ENSG00000170866	LILRA3	leukocyte immunoglobulin-like receptor, subfamily A (without TM domain), member 3 [Source:HGNC Symbol;Acc:6604]	277.624	4.69189	1.08748	4.31447	1.59987e-05	0.00366481
ENSG00000149380	P4HA3	prolyl 4-hydroxylase, alpha polypeptide III [Source:HGNC Symbol;Acc:30135]	27.4397	4.56679	1.15316	3.96025	7.48715e-05	0.0107379
ENSG00000164400	CSF2	colony stimulating factor 2 (granulocyte-macrophage) [Source:HGNC Symbol;Acc:2434]	49.2067	4.54229	1.25608	3.61624	0.000298913	0.0260845
ENSG00000196228	SULT1C3	sulfotransferase family, cytosolic, 1C, member 3 [Source:HGNC Symbol;Acc:33543]	40.7499	4.51809	1.12239	4.0254	5.68786e-05	0.00884999
ENSG00000203857	HSD3B1	hydroxy-delta-5-steroid dehydrogenase, 3 beta- and steroid delta-isomerase 1 [Source:HGNC Symbol;Acc:5217]	41.35	4.49605	1.49161	3.01422	0.00257642	0.0949578
ENSG00000178342	KCNG2	potassium voltage-gated channel, subfamily G, member 2 [Source:HGNC Symbol;Acc:6249]	9.05059	4.37809	1.64624	2.65945	0.00782678	NA
ENSG00000140932	CMTM2	CKLF-like MARVEL transmembrane domain containing 2 [Source:HGNC Symbol;Acc:19173]	133.218	4.37011	1.16342	3.75624	0.000172482	0.0178915
ENSG00000147145	LPAR4	lysophosphatidic acid receptor 4 [Source:HGNC Symbol;Acc:4478]	9.14732	4.35474	1.48618	2.93017	0.0033878	NA
ENSG00000104415	WISP1	WNT1 inducible signaling pathway protein 1 [Source:HGNC Symbol;Acc:12769]	174.911	4.24776	1.1054	3.84275	0.000121662	0.014032
ENSG00000134757	DSG3	desmoglein 3 [Source:HGNC Symbol;Acc:3050]	77.2089	4.14293	1.21145	3.41982	0.000626625	0.0408495
ENSG00000117594	HSD11B1	hydroxysteroid (11-beta) dehydrogenase 1 [Source:HGNC Symbol;Acc:5208]	93.3131	4.08387	0.897838	4.54856	5.40145e-06	0.00148477
ENSG00000267034			8.50667	4.055	1.50074	2.70201	0.00689218	NA
ENSG00000254281			27.2001	4.02253	1.54012	2.61183	0.00900587	0.160404
ENSG00000181215	C4orf50	chromosome 4 open reading frame 50 [Source:HGNC Symbol;Acc:33766]	7.24606	4.01564	1.53647	2.61354	0.00896096	NA
ENSG00000124479	NDP	Norrie disease (pseudoglioma) [Source:HGNC Symbol;Acc:7678]	7.51727	3.96204	1.36005	2.91316	0.00357796	NA
ENSG00000173406	DAB1	Dab, reelin signal transducer, homolog 1 (Drosophila) [Source:HGNC Symbol;Acc:2661]	183.784	3.9557	1.00884	3.92105	8.81647e-05	0.0117266
ENSG00000115507	OTX1	orthodenticle homeobox 1 [Source:HGNC Symbol;Acc:8521]	10.9655	3.95339	1.42205	2.78005	0.00543499	NA
ENSG00000163221	S100A12	S100 calcium binding protein A12 [Source:HGNC Symbol;Acc:10489]	501.594	3.89985	1.18337	3.29555	0.000982309	0.0524811
ENSG00000164694	FNDC1	fibronectin type III domain containing 1 [Source:HGNC Symbol;Acc:21184]	474.868	3.89953	1.04548	3.72988	0.000191572	0.0192659
ENSG00000207652	MIR621	microRNA 621 [Source:HGNC Symbol;Acc:32877]	7.34604	3.8864	1.33609	2.9088	0.00362821	NA
ENSG00000093134	VNN3	vanin 3 [Source:HGNC Symbol;Acc:16431]	31.0084	3.82924	1.26788	3.02019	0.00252612	0.0940481
ENSG00000151790	TDO2	tryptophan 2,3-dioxygenase [Source:HGNC Symbol;Acc:11708]	224.255	3.69099	0.929669	3.97022	7.18053e-05	0.010574
ENSG00000251095			17.373	3.68498	1.32818	2.77446	0.00552929	0.129722
ENSG00000124875	CXCL6	chemokine (C-X-C motif) ligand 6 [Source:HGNC Symbol;Acc:10643]	614.945	3.67139	1.05412	3.4829	0.000496022	0.0348123
ENSG00000211672	IGLV4-3	immunoglobulin lambda variable 4-3 [Source:HGNC Symbol;Acc:5919]	26.7687	3.66527	0.733585	4.99638	5.84171e-07	0.000200724
ENSG00000085265	FCN1	ficolin (collagen/fibrinogen domain containing) 1 [Source:HGNC Symbol;Acc:3623]	485.566	3.6587	0.947407	3.8618	0.000112554	0.0134628
ENSG00000242371	IGKV1-39	immunoglobulin kappa variable 1-39 (gene/pseudogene) [Source:HGNC Symbol;Acc:5740]	7.71612	3.64166	1.25335	2.90554	0.00366623	NA
ENSG00000162670	BRINP3	bone morphogenetic protein/retinoic acid inducible neural-specific 3 [Source:HGNC Symbol;Acc:22393]	128.513	3.63845	1.05362	3.45327	0.000553834	0.0374038
ENSG00000164932	CTHRC1	collagen triple helix repeat containing 1 [Source:HGNC Symbol;Acc:18831]	163.787	3.61301	0.934269	3.86721	0.000110089	0.0133508
ENSG00000129048	ACKR4	atypical chemokine receptor 4 [Source:HGNC Symbol;Acc:1611]	121.074	3.59469	1.04364	3.44439	0.000572355	0.0380639
ENSG00000185269	NOTUM	notum pectinacetylesterase homolog (Drosophila) [Source:HGNC Symbol;Acc:27106]	40.544	3.57039	1.16758	3.05794	0.00222865	0.0871022
ENSG00000177494	ZBED2	zinc finger, BED-type containing 2 [Source:HGNC Symbol;Acc:20710]	12.6771	3.56394	1.24667	2.85877	0.00425281	NA
ENSG00000222037	IGLC6	immunoglobulin lambda constant 6 (Kern marker, gene/pseudogene) [Source:HGNC Symbol;Acc:5860]	30.0324	3.55697	1.23324	2.88425	0.00392352	0.112424
ENSG00000149968	MMP3	matrix metallopeptidase 3 (stromelysin 1, progelatinase) [Source:HGNC Symbol;Acc:7173]	4051.63	3.53474	1.09102	3.23985	0.00119594	0.0588794
ENSG00000206384	COL6A6	collagen, type VI, alpha 6 [Source:HGNC Symbol;Acc:27023]	5.13615	3.53044	1.33821	2.63817	0.00833541	NA
ENSG00000171051	FPR1	formyl peptide receptor 1 [Source:HGNC Symbol;Acc:3826]	1093.99	3.52671	0.970466	3.63404	0.000279021	0.0247913
ENSG00000110944	IL23A	interleukin 23, alpha subunit p19 [Source:HGNC Symbol;Acc:15488]	34.2736	3.51047	1.2943	2.71225	0.00668279	0.140295
ENSG00000237989			42.2439	3.47657	1.33304	2.608	0.00910732	0.160792
ENSG00000165376	CLDN2	claudin 2 [Source:HGNC Symbol;Acc:2041]	1334.9	3.47628	0.916249	3.79404	0.000148218	0.0161891
ENSG00000136689	IL1RN	interleukin 1 receptor antagonist [Source:HGNC Symbol;Acc:6000]	4867.33	3.47054	0.896652	3.87056	0.000108587	0.0132661
ENSG00000106366	SERPINE1	serpin peptidase inhibitor, clade E (nexin, plasminogen activator inhibitor type 1), member 1 [Source:HGNC Symbol;Acc:8583]	808.589	3.42142	0.981601	3.48555	0.000491127	0.0347395
ENSG00000270547			39.5148	3.41181	1.20192	2.83863	0.0045307	0.118405
ENSG00000138061	CYP1B1	cytochrome P450, family 1, subfamily B, polypeptide 1 [Source:HGNC Symbol;Acc:2597]	101.352	3.39846	0.748292	4.54162	5.58235e-06	0.00150934
ENSG00000178752	FAM132B	family with sequence similarity 132, member B [Source:HGNC Symbol;Acc:26727]	27.8534	3.3855	1.24134	2.72731	0.00638536	0.138766
ENSG00000167755	KLK6	kallikrein-related peptidase 6 [Source:HGNC Symbol;Acc:6367]	205.691	3.35788	1.23325	2.72278	0.00647356	0.138841
ENSG00000168334	XIRP1	xin actin-binding repeat containing 1 [Source:HGNC Symbol;Acc:14301]	13.2545	3.35667	1.19918	2.79913	0.00512409	NA
ENSG00000103313	MEFV	Mediterranean fever [Source:HGNC Symbol;Acc:6998]	178.615	3.32079	0.825691	4.02183	5.77473e-05	0.00890118
ENSG00000079215	SLC1A3	solute carrier family 1 (glial high affinity glutamate transporter), member 3 [Source:HGNC Symbol;Acc:10941]	116.241	3.30165	1.05827	3.11985	0.00180942	0.0768563
ENSG00000171049	FPR2	formyl peptide receptor 2 [Source:HGNC Symbol;Acc:3827]	305.607	3.27533	1.19343	2.74447	0.00606091	0.135267
ENSG00000174175	SELP	selectin P (granule membrane protein 140kDa, antigen CD62) [Source:HGNC Symbol;Acc:10721]	268.015	3.26324	0.789739	4.13205	3.59548e-05	0.00658892
ENSG00000124731	TREM1	triggering receptor expressed on myeloid cells 1 [Source:HGNC Symbol;Acc:17760]	414.165	3.26286	1.14011	2.86188	0.0042114	0.115165
ENSG00000166670	MMP10	matrix metallopeptidase 10 (stromelysin 2) [Source:HGNC Symbol;Acc:7156]	146.142	3.25347	1.12141	2.90124	0.00371694	0.1092
ENSG00000161798	AQP5	aquaporin 5 [Source:HGNC Symbol;Acc:638]	70.4382	3.2386	0.852285	3.7999	0.000144756	0.0160232
ENSG00000226197			26.9966	3.2326	1.19266	2.71041	0.00672001	0.140295
ENSG00000113749	HRH2	histamine receptor H2 [Source:HGNC Symbol;Acc:5183]	70.2782	3.22636	1.21934	2.64598	0.00814541	0.154594
ENSG00000166741	NNMT	nicotinamide N-methyltransferase [Source:HGNC Symbol;Acc:7861]	822.504	3.22336	0.855857	3.76624	0.000165726	0.0175213
ENSG00000157064	NMNAT2	nicotinamide nucleotide adenylyltransferase 2 [Source:HGNC Symbol;Acc:16789]	27.8712	3.19584	1.10643	2.88843	0.00387172	0.111781
ENSG00000179546	HTR1D	5-hydroxytryptamine (serotonin) receptor 1D, G protein-coupled [Source:HGNC Symbol;Acc:5289]	82.2315	3.18436	0.945556	3.36772	0.000757935	0.0452921
ENSG00000054938	CHRDL2	chordin-like 2 [Source:HGNC Symbol;Acc:24168]	242.525	3.18005	0.927496	3.42864	0.000606603	0.0400188
ENSG00000163817	SLC6A20	solute carrier family 6 (proline IMINO transporter), member 20 [Source:HGNC Symbol;Acc:30927]	358.748	3.16608	0.810019	3.90864	9.28153e-05	0.0121492
ENSG00000133048	CHI3L1	chitinase 3-like 1 (cartilage glycoprotein-39) [Source:HGNC Symbol;Acc:1932]	2826.57	3.14519	0.723709	4.34593	1.38687e-05	0.00326766
ENSG00000259490	IGHV3OR15-7	immunoglobulin heavy variable 3/OR15-7 (pseudogene) [Source:HGNC Symbol;Acc:5633]	21.0065	3.12588	0.954138	3.27613	0.00105238	0.0545817
ENSG00000050730	TNIP3	TNFAIP3 interacting protein 3 [Source:HGNC Symbol;Acc:19315]	545.208	3.1189	1.06228	2.93604	0.00332429	0.104433
ENSG00000180871	CXCR2	chemokine (C-X-C motif) receptor 2 [Source:HGNC Symbol;Acc:6027]	723.191	3.11807	1.08599	2.87118	0.00408942	0.114317
ENSG00000078098	FAP	fibroblast activation protein, alpha [Source:HGNC Symbol;Acc:3590]	130.831	3.07578	0.928328	3.31324	0.000922203	0.051559
ENSG00000143546	S100A8	S100 calcium binding protein A8 [Source:HGNC Symbol;Acc:10498]	7569.33	3.05148	1.02793	2.96858	0.00299175	0.101113
ENSG00000211892	IGHG4	immunoglobulin heavy constant gamma 4 (G4m marker) [Source:HGNC Symbol;Acc:5528]	21230.7	3.03535	0.969894	3.12957	0.0017506	0.0757834
ENSG00000112299	VNN1	vanin 1 [Source:HGNC Symbol;Acc:12705]	492.727	3.00728	0.917714	3.27693	0.00104944	0.0545817
ENSG00000138356	AOX1	aldehyde oxidase 1 [Source:HGNC Symbol;Acc:553]	84.5096	2.9864	0.863295	3.45931	0.000541567	0.037217
ENSG00000225471			32.0789	2.98293	1.12042	2.66233	0.00776015	0.151323
ENSG00000138722	MMRN1	multimerin 1 [Source:HGNC Symbol;Acc:7178]	414.263	2.97556	0.756915	3.93117	8.45351e-05	0.0115226
ENSG00000205403	CFI	complement factor I [Source:HGNC Symbol;Acc:5394]	892.378	2.94687	0.992241	2.96991	0.00297884	0.100883
ENSG00000127954	STEAP4	STEAP family member 4 [Source:HGNC Symbol;Acc:21923]	254.445	2.94599	0.889722	3.31113	0.000929192	0.0516836
ENSG00000156687	UNC5D	unc-5 homolog D (C. elegans) [Source:HGNC Symbol;Acc:18634]	50.2311	2.94489	1.02979	2.8597	0.00424047	0.115165
ENSG00000233999	IGKV3OR2-268	immunoglobulin kappa variable 3/OR2-268 (non-functional) [Source:HGNC Symbol;Acc:5830]	10.5622	2.93883	0.972432	3.02215	0.00250989	NA
ENSG00000204442	FAM155A	family with sequence similarity 155, member A [Source:HGNC Symbol;Acc:33877]	32.44	2.90886	1.06796	2.72376	0.00645433	0.138766
ENSG00000167767	KRT80	keratin 80 [Source:HGNC Symbol;Acc:27056]	20.0415	2.8927	1.1145	2.5955	0.0094453	0.163464
ENSG00000111052	LIN7A	lin-7 homolog A (C. elegans) [Source:HGNC Symbol;Acc:17787]	65.9159	2.88662	0.963997	2.99442	0.00274963	0.0975647
ENSG00000258227	CLEC5A	C-type lectin domain family 5, member A [Source:HGNC Symbol;Acc:2054]	56.7539	2.87295	1.02269	2.80921	0.00496637	0.123033
ENSG00000041982	TNC	tenascin C [Source:HGNC Symbol;Acc:5318]	2902.71	2.87182	0.758055	3.78841	0.000151615	0.0164513
ENSG00000163563	MNDA	myeloid cell nuclear differentiation antigen [Source:HGNC Symbol;Acc:7183]	787.144	2.82808	0.842504	3.35675	0.00078864	0.0459613
ENSG00000064886	CHI3L2	chitinase 3-like 2 [Source:HGNC Symbol;Acc:1933]	196.688	2.80724	0.971541	2.88947	0.00385892	0.111658
ENSG00000150337	FCGR1A	Fc fragment of IgG, high affinity Ia, receptor (CD64) [Source:HGNC Symbol;Acc:3613]	75.3162	2.78518	0.976897	2.85105	0.00435755	0.115545
ENSG00000211899	IGHM	immunoglobulin heavy constant mu [Source:HGNC Symbol;Acc:5541]	109212	2.76216	0.753896	3.66385	0.000248448	0.0228919
ENSG00000123610	TNFAIP6	tumor necrosis factor, alpha-induced protein 6 [Source:HGNC Symbol;Acc:11898]	311.359	2.75164	1.06468	2.58448	0.0097525	0.164972
ENSG00000111913	FAM65B	family with sequence similarity 65, member B [Source:HGNC Symbol;Acc:13872]	374.923	2.75132	0.910379	3.02217	0.00250973	0.0938615
ENSG00000157766	ACAN	aggrecan [Source:HGNC Symbol;Acc:319]	20.0442	2.74609	0.792911	3.4633	0.000533593	0.0368224
ENSG00000126262	FFAR2	free fatty acid receptor 2 [Source:HGNC Symbol;Acc:4501]	402.114	2.74472	0.957703	2.86594	0.00415768	0.115165
ENSG00000134827	TCN1	transcobalamin I (vitamin B12 binding protein, R binder family) [Source:HGNC Symbol;Acc:11652]	172.139	2.71769	0.83813	3.24256	0.0011846	0.0586713
ENSG00000186340	THBS2	thrombospondin 2 [Source:HGNC Symbol;Acc:11786]	444.165	2.71659	0.967248	2.80858	0.00497605	0.123043
ENSG00000162747	FCGR3B	Fc fragment of IgG, low affinity IIIb, receptor (CD16b) [Source:HGNC Symbol;Acc:3620]	1180.59	2.71185	0.935274	2.89952	0.00373735	0.109291
ENSG00000168917	SLC35G2	solute carrier family 35, member G2 [Source:HGNC Symbol;Acc:28480]	30.3414	2.68259	0.826523	3.24563	0.00117189	0.0583697
ENSG00000167656	LY6D	lymphocyte antigen 6 complex, locus D [Source:HGNC Symbol;Acc:13348]	45.7136	2.67574	0.913567	2.92889	0.00340175	0.104677
ENSG00000113739	STC2	stanniocalcin 2 [Source:HGNC Symbol;Acc:11374]	54.0445	2.65993	0.680353	3.90963	9.24379e-05	0.0121492
ENSG00000173535	TNFRSF10C	tumor necrosis factor receptor superfamily, member 10c, decoy without an intracellular domain [Source:HGNC Symbol;Acc:11906]	246.093	2.64782	0.886402	2.98715	0.00281593	0.0977751
ENSG00000140379	BCL2A1	BCL2-related protein A1 [Source:HGNC Symbol;Acc:991]	1048.21	2.64069	0.873422	3.02338	0.00249968	0.0936983
ENSG00000173432	SAA1	serum amyloid A1 [Source:HGNC Symbol;Acc:10513]	304.303	2.63795	0.971668	2.71487	0.00663012	0.140295
ENSG00000241566	IGKV2D-24	immunoglobulin kappa variable 2D-24 (non-functional) [Source:HGNC Symbol;Acc:5797]	69.5163	2.63193	0.970027	2.71325	0.00666262	0.140295
ENSG00000054598	FOXC1	forkhead box C1 [Source:HGNC Symbol;Acc:3800]	53.8213	2.61192	0.7916	3.29954	0.000968426	0.0520875
ENSG00000164920	OSR2	odd-skipped related transciption factor 2 [Source:HGNC Symbol;Acc:15830]	202.751	2.60178	0.955315	2.72347	0.00645994	0.138766
ENSG00000206075	SERPINB5	serpin peptidase inhibitor, clade B (ovalbumin), member 5 [Source:HGNC Symbol;Acc:8949]	323.251	2.58981	0.920573	2.81326	0.00490419	0.121998
ENSG00000229644	NAMPTL	nicotinamide phosphoribosyltransferase-like [Source:HGNC Symbol;Acc:17633]	25.5376	2.58919	0.878748	2.94645	0.00321444	0.104157
ENSG00000142583	SLC2A5	solute carrier family 2 (facilitated glucose/fructose transporter), member 5 [Source:HGNC Symbol;Acc:11010]	602.083	2.5726	0.902895	2.84928	0.00438183	0.115816
ENSG00000162493	PDPN	podoplanin [Source:HGNC Symbol;Acc:29602]	536.049	2.56424	0.711605	3.60346	0.000314008	0.0269737
ENSG00000253755	IGHGP	immunoglobulin heavy constant gamma P (non-functional) [Source:HGNC Symbol;Acc:5529]	11006.7	2.56048	0.902721	2.8364	0.00456257	0.118405
ENSG00000111341	MGP	matrix Gla protein [Source:HGNC Symbol;Acc:7060]	1255.67	2.50686	0.76862	3.2615	0.00110824	0.0564141
ENSG00000127241	MASP1	mannan-binding lectin serine peptidase 1 (C4/C2 activating component of Ra-reactive factor) [Source:HGNC Symbol;Acc:6901]	291.193	2.50551	0.865961	2.89333	0.00381179	0.111074
ENSG00000168685	IL7R	interleukin 7 receptor [Source:HGNC Symbol;Acc:6024]	1361.35	2.50434	0.800221	3.12957	0.00175065	0.0757834
ENSG00000134339	SAA2	serum amyloid A2 [Source:HGNC Symbol;Acc:10514]	74.1196	2.49762	0.880643	2.83614	0.00456631	0.118405
ENSG00000163220	S100A9	S100 calcium binding protein A9 [Source:HGNC Symbol;Acc:10499]	4303.9	2.4923	0.914525	2.72524	0.00642556	0.138766
ENSG00000122641	INHBA	inhibin, beta A [Source:HGNC Symbol;Acc:6066]	708.873	2.48217	0.8815	2.81584	0.00486496	0.121541
ENSG00000100678	SLC8A3	solute carrier family 8 (sodium/calcium exchanger), member 3 [Source:HGNC Symbol;Acc:11070]	20.1845	2.48121	0.805789	3.07923	0.00207536	0.0830799
ENSG00000169876	MUC17	mucin 17, cell surface associated [Source:HGNC Symbol;Acc:16800]	10157.5	2.47207	0.770404	3.2088	0.0013329	0.0639057
ENSG00000239998	LILRA2	leukocyte immunoglobulin-like receptor, subfamily A (with TM domain), member 2 [Source:HGNC Symbol;Acc:6603]	113.004	2.45589	0.835745	2.93856	0.00329742	0.104185
ENSG00000172782	FADS6	fatty acid desaturase 6 [Source:HGNC Symbol;Acc:30459]	67.9957	2.44942	0.861121	2.84445	0.00444877	0.116861
ENSG00000153132	CLGN	calmegin [Source:HGNC Symbol;Acc:2060]	18.8892	2.44737	0.728042	3.36158	0.000774987	0.0456495
ENSG00000155465	SLC7A7	solute carrier family 7 (amino acid transporter light chain, y system), member 7 [Source:HGNC Symbol;Acc:11065]	637.056	2.44022	0.668467	3.65047	0.000261758	0.0238518
ENSG00000105928	DFNA5	deafness, autosomal dominant 5 [Source:HGNC Symbol;Acc:2810]	117.229	2.42958	0.856896	2.83532	0.00457795	0.118405
ENSG00000175445	LPL	lipoprotein lipase [Source:HGNC Symbol;Acc:6677]	270.931	2.4248	0.886878	2.73408	0.0062554	0.137946
ENSG00000134363	FST	follistatin [Source:HGNC Symbol;Acc:3971]	48.4016	2.41996	0.71074	3.40484	0.000662033	0.0421908
ENSG00000167772	ANGPTL4	angiopoietin-like 4 [Source:HGNC Symbol;Acc:16039]	161.301	2.4029	0.666274	3.60647	0.000310393	0.0269437
ENSG00000115919	KYNU	kynureninase [Source:HGNC Symbol;Acc:6469]	275.615	2.39713	0.889005	2.69642	0.00700885	0.143777
ENSG00000260997			34.0761	2.39573	0.91697	2.61266	0.00898418	0.16019
ENSG00000214212	C19orf38	chromosome 19 open reading frame 38 [Source:HGNC Symbol;Acc:34073]	126.261	2.38801	0.744598	3.20711	0.00134076	0.0640962
ENSG00000106952	TNFSF8	tumor necrosis factor (ligand) superfamily, member 8 [Source:HGNC Symbol;Acc:11938]	76.2656	2.38688	0.790916	3.01786	0.00254562	0.0941367
ENSG00000188404	SELL	selectin L [Source:HGNC Symbol;Acc:10720]	780.219	2.38628	0.830344	2.87385	0.00405504	0.113971
ENSG00000182492	BGN	biglycan [Source:HGNC Symbol;Acc:1044]	1652.82	2.36663	0.682174	3.46925	0.00052191	0.0361675
ENSG00000170396	ZNF804A	zinc finger protein 804A [Source:HGNC Symbol;Acc:21711]	44.5377	2.3579	0.84597	2.78722	0.00531626	0.126342
ENSG00000267152			12.9539	2.35079	0.806432	2.91505	0.00355629	NA
ENSG00000167476	JSRP1	junctional sarcoplasmic reticulum protein 1 [Source:HGNC Symbol;Acc:24963]	134.563	2.3424	0.81284	2.88175	0.00395472	0.112798
ENSG00000178726	THBD	thrombomodulin [Source:HGNC Symbol;Acc:11784]	406.305	2.33138	0.717639	3.24868	0.00115942	0.0581225
ENSG00000198829	SUCNR1	succinate receptor 1 [Source:HGNC Symbol;Acc:4542]	51.3461	2.28525	0.770563	2.96569	0.00302009	0.101491
ENSG00000156127	BATF	basic leucine zipper transcription factor, ATF-like [Source:HGNC Symbol;Acc:958]	278.688	2.28461	0.816648	2.79755	0.00514914	0.124889
ENSG00000109743	BST1	bone marrow stromal cell antigen 1 [Source:HGNC Symbol;Acc:1118]	246.259	2.26606	0.667547	3.39461	0.000687269	0.043132
ENSG00000211946	IGHV3-20	immunoglobulin heavy variable 3-20 [Source:HGNC Symbol;Acc:5585]	217.836	2.2646	0.580852	3.89876	9.66866e-05	0.0121729
ENSG00000134070	IRAK2	interleukin-1 receptor-associated kinase 2 [Source:HGNC Symbol;Acc:6113]	171.58	2.23687	0.73771	3.03218	0.00242793	0.0918435
ENSG00000147408	CSGALNACT1	chondroitin sulfate N-acetylgalactosaminyltransferase 1 [Source:HGNC Symbol;Acc:24290]	167.626	2.23561	0.797452	2.80344	0.00505606	0.1236
ENSG00000029534	ANK1	ankyrin 1, erythrocytic [Source:HGNC Symbol;Acc:492]	91.3793	2.23213	0.862537	2.58786	0.00965729	0.164912
ENSG00000147206	NXF3	nuclear RNA export factor 3 [Source:HGNC Symbol;Acc:8073]	46.7454	2.22577	0.797548	2.79076	0.00525844	0.125874
ENSG00000184956	MUC6	mucin 6, oligomeric mucus/gel-forming [Source:HGNC Symbol;Acc:7517]	12747.4	2.22265	0.846772	2.62485	0.00866876	0.158508
ENSG00000244731	C4A	complement component 4A (Rodgers blood group) [Source:HGNC Symbol;Acc:1323]	52.9696	2.21206	0.711492	3.10905	0.00187693	0.0784579
ENSG00000091129	NRCAM	neuronal cell adhesion molecule [Source:HGNC Symbol;Acc:7994]	121.903	2.20642	0.835518	2.64079	0.00827139	0.155553
ENSG00000164691	TAGAP	T-cell activation RhoGTPase activating protein [Source:HGNC Symbol;Acc:15669]	578.896	2.20089	0.823589	2.67232	0.00753293	0.149073
ENSG00000157514	TSC22D3	TSC22 domain family, member 3 [Source:HGNC Symbol;Acc:3051]	1072.52	2.18847	0.658981	3.32099	0.000896981	0.0508596
ENSG00000166278	C2	complement component 2 [Source:HGNC Symbol;Acc:1248]	24.5656	2.17895	0.723104	3.01333	0.00258402	0.0949578
ENSG00000125730	C3	complement component 3 [Source:HGNC Symbol;Acc:1318]	3695.76	2.17852	0.637818	3.41559	0.000636446	0.0413264
ENSG00000151617	EDNRA	endothelin receptor type A [Source:HGNC Symbol;Acc:3179]	126.898	2.16675	0.694915	3.11801	0.00182079	0.0768563
ENSG00000156140	ADAMTS3	ADAM metallopeptidase with thrombospondin type 1 motif, 3 [Source:HGNC Symbol;Acc:219]	14.6517	2.12898	0.815583	2.61038	0.00904428	NA
ENSG00000088826	SMOX	spermine oxidase [Source:HGNC Symbol;Acc:15862]	194.373	2.11584	0.667108	3.17166	0.00151569	0.0704178
ENSG00000047457	CP	ceruloplasmin (ferroxidase) [Source:HGNC Symbol;Acc:2295]	281.777	2.10482	0.505779	4.16154	3.16105e-05	0.00620658
ENSG00000124216	SNAI1	snail family zinc finger 1 [Source:HGNC Symbol;Acc:11128]	129.536	2.10411	0.79318	2.65275	0.00798396	0.153294
ENSG00000167244	IGF2	insulin-like growth factor 2 (somatomedin A) [Source:HGNC Symbol;Acc:5466]	1718.18	2.08046	0.630591	3.29922	0.000969555	0.0520875
ENSG00000225492	GBP1P1	guanylate binding protein 1, interferon-inducible pseudogene 1 [Source:HGNC Symbol;Acc:39561]	60.4199	2.07751	0.777897	2.67068	0.00756988	0.149521
ENSG00000211942	IGHV3-13	immunoglobulin heavy variable 3-13 [Source:HGNC Symbol;Acc:5581]	857.264	2.06998	0.725728	2.85227	0.00434076	0.115545
ENSG00000050767	COL23A1	collagen, type XXIII, alpha 1 [Source:HGNC Symbol;Acc:22990]	95.2583	2.06843	0.748816	2.76227	0.00574007	0.131488
ENSG00000131910	NR0B2	nuclear receptor subfamily 0, group B, member 2 [Source:HGNC Symbol;Acc:7961]	191.798	2.05204	0.782332	2.62297	0.00871661	0.158852
ENSG00000151468	CCDC3	coiled-coil domain containing 3 [Source:HGNC Symbol;Acc:23813]	246.852	2.0433	0.753769	2.71078	0.00671247	0.140295
ENSG00000148848	ADAM12	ADAM metallopeptidase domain 12 [Source:HGNC Symbol;Acc:190]	185.35	2.04045	0.788699	2.58711	0.00967859	0.164912
ENSG00000090382	LYZ	lysozyme [Source:HGNC Symbol;Acc:6740]	14571.8	2.03408	0.695428	2.92493	0.00344532	0.105438
ENSG00000211976	IGHV3-73	immunoglobulin heavy variable 3-73 [Source:HGNC Symbol;Acc:5623]	1269.41	2.01608	0.637544	3.16226	0.00156552	0.071524
ENSG00000152583	SPARCL1	SPARC-like 1 (hevin) [Source:HGNC Symbol;Acc:11220]	1982.64	2.00831	0.638586	3.14493	0.00166129	0.0733461
ENSG00000211950	IGHV1-24	immunoglobulin heavy variable 1-24 [Source:HGNC Symbol;Acc:5551]	534.321	2.00676	0.668524	3.00178	0.00268407	0.0966558
ENSG00000249751	ECSCR	endothelial cell surface expressed chemotaxis and apoptosis regulator [Source:HGNC Symbol;Acc:35454]	153.531	2.00413	0.677898	2.95639	0.00311268	0.103149
ENSG00000225698	IGHV3-72	immunoglobulin heavy variable 3-72 [Source:HGNC Symbol;Acc:5622]	2651.21	2.00318	0.695226	2.88134	0.00395986	0.112798
ENSG00000211679	IGLC3	immunoglobulin lambda constant 3 (Kern-Oz marker) [Source:HGNC Symbol;Acc:5857]	24912.7	1.99498	0.609265	3.27441	0.00105884	0.0547443
ENSG00000091879	ANGPT2	angiopoietin 2 [Source:HGNC Symbol;Acc:485]	81.6714	1.99393	0.752559	2.64954	0.00806023	0.154465
ENSG00000103257	SLC7A5	solute carrier family 7 (amino acid transporter light chain, L system), member 5 [Source:HGNC Symbol;Acc:11063]	683.62	1.97986	0.64158	3.08591	0.00202932	0.0824375
ENSG00000135480	KRT7	keratin 7 [Source:HGNC Symbol;Acc:6445]	126.023	1.97818	0.647534	3.05495	0.002251	0.0872971
ENSG00000135069	PSAT1	phosphoserine aminotransferase 1 [Source:HGNC Symbol;Acc:19129]	145.122	1.97716	0.506875	3.90069	9.59174e-05	0.0121729
ENSG00000211664	IGLV2-18	immunoglobulin lambda variable 2-18 [Source:HGNC Symbol;Acc:5889]	487.715	1.97408	0.684067	2.8858	0.00390421	0.112377
ENSG00000006074	CCL18	chemokine (C-C motif) ligand 18 (pulmonary and activation-regulated) [Source:HGNC Symbol;Acc:10616]	1317.76	1.97268	0.729812	2.703	0.00687172	0.142202
ENSG00000110799	VWF	von Willebrand factor [Source:HGNC Symbol;Acc:12726]	1371.38	1.94916	0.61048	3.19284	0.00140881	0.0666396
ENSG00000115461	IGFBP5	insulin-like growth factor binding protein 5 [Source:HGNC Symbol;Acc:5474]	9516.93	1.9316	0.692891	2.78774	0.00530764	0.126319
ENSG00000088002	SULT2B1	sulfotransferase family, cytosolic, 2B, member 1 [Source:HGNC Symbol;Acc:11459]	84.3493	1.92864	0.640453	3.01137	0.0026007	0.0953185
ENSG00000119681	LTBP2	latent transforming growth factor beta binding protein 2 [Source:HGNC Symbol;Acc:6715]	456.639	1.92669	0.575998	3.34497	0.000822928	0.0472911
ENSG00000239855	IGKV1-6	immunoglobulin kappa variable 1-6 [Source:HGNC Symbol;Acc:5742]	1718.58	1.9263	0.691494	2.7857	0.00534122	0.12657
ENSG00000168421	RHOH	ras homolog family member H [Source:HGNC Symbol;Acc:686]	207.601	1.92329	0.746096	2.57781	0.00994295	0.166225
ENSG00000131389	SLC6A6	solute carrier family 6 (neurotransmitter transporter), member 6 [Source:HGNC Symbol;Acc:11052]	798.949	1.9228	0.654093	2.93964	0.00328597	0.104185
ENSG00000204444	APOM	apolipoprotein M [Source:HGNC Symbol;Acc:13916]	37.2531	1.92233	0.639584	3.0056	0.00265059	0.0962784
ENSG00000142871	CYR61	cysteine-rich, angiogenic inducer, 61 [Source:HGNC Symbol;Acc:2654]	1072.78	1.91006	0.680786	2.80566	0.00502129	0.123422
ENSG00000137033	IL33	interleukin 33 [Source:HGNC Symbol;Acc:16028]	250.136	1.90911	0.69261	2.7564	0.00584412	0.132582
ENSG00000117228	GBP1	guanylate binding protein 1, interferon-inducible [Source:HGNC Symbol;Acc:4182]	2083.39	1.90744	0.710965	2.68289	0.00729884	0.146024
ENSG00000240671	IGKV1-8	immunoglobulin kappa variable 1-8 [Source:HGNC Symbol;Acc:5743]	967.011	1.89502	0.687296	2.75722	0.00582956	0.132582
ENSG00000087245	MMP2	matrix metallopeptidase 2 (gelatinase A, 72kDa gelatinase, 72kDa type IV collagenase) [Source:HGNC Symbol;Acc:7166]	6018.31	1.88546	0.686023	2.7484	0.00598873	0.134751
ENSG00000109099	PMP22	peripheral myelin protein 22 [Source:HGNC Symbol;Acc:9118]	1818.87	1.88445	0.657851	2.86455	0.004176	0.115165
ENSG00000240864	IGKV1-16	immunoglobulin kappa variable 1-16 [Source:HGNC Symbol;Acc:5732]	2085.11	1.88401	0.64097	2.93932	0.00328937	0.104185
ENSG00000116741	RGS2	regulator of G-protein signaling 2, 24kDa [Source:HGNC Symbol;Acc:9998]	1420.84	1.87933	0.608977	3.08604	0.00202843	0.0824375
ENSG00000087510	TFAP2C	transcription factor AP-2 gamma (activating enhancer binding protein 2 gamma) [Source:HGNC Symbol;Acc:11744]	69.0878	1.87772	0.608781	3.08439	0.0020397	0.0825211
ENSG00000061918	GUCY1B3	guanylate cyclase 1, soluble, beta 3 [Source:HGNC Symbol;Acc:4687]	113.479	1.87684	0.543807	3.4513	0.000557893	0.0374038
ENSG00000170801	HTRA3	HtrA serine peptidase 3 [Source:HGNC Symbol;Acc:30406]	322.512	1.87656	0.699767	2.68169	0.00732506	0.14609
ENSG00000115165	CYTIP	cytohesin 1 interacting protein [Source:HGNC Symbol;Acc:9506]	624.55	1.87574	0.645143	2.90748	0.0036435	0.108863
ENSG00000143248	RGS5	regulator of G-protein signaling 5 [Source:HGNC Symbol;Acc:10001]	2343.72	1.85299	0.656486	2.82259	0.00476373	0.120689
ENSG00000259261	IGHV4OR15-8	immunoglobulin heavy variable 4/OR15-8 (non-functional) [Source:HGNC Symbol;Acc:5658]	375.74	1.85231	0.706618	2.62138	0.00875753	0.158852
ENSG00000211962	IGHV1-46	immunoglobulin heavy variable 1-46 [Source:HGNC Symbol;Acc:5554]	3016.61	1.84351	0.547228	3.36882	0.000754916	0.0452758
ENSG00000102265	TIMP1	TIMP metallopeptidase inhibitor 1 [Source:HGNC Symbol;Acc:11820]	5573.12	1.84287	0.6148	2.99751	0.00272191	0.0971699
ENSG00000096060	FKBP5	FK506 binding protein 5 [Source:HGNC Symbol;Acc:3721]	2517.71	1.83691	0.65527	2.80328	0.00505852	0.1236
ENSG00000181634	TNFSF15	tumor necrosis factor (ligand) superfamily, member 15 [Source:HGNC Symbol;Acc:11931]	205.619	1.83029	0.705066	2.59591	0.00943403	0.163464
ENSG00000163347	CLDN1	claudin 1 [Source:HGNC Symbol;Acc:2032]	127.195	1.82438	0.669254	2.72599	0.00641099	0.138766
ENSG00000165388	ZNF488	zinc finger protein 488 [Source:HGNC Symbol;Acc:23535]	133.381	1.82325	0.643469	2.83348	0.00460448	0.118405
ENSG00000116678	LEPR	leptin receptor [Source:HGNC Symbol;Acc:6554]	87.0629	1.81238	0.519478	3.48884	0.000485118	0.0346366
ENSG00000146374	RSPO3	R-spondin 3 [Source:HGNC Symbol;Acc:20866]	95.7513	1.81157	0.615901	2.94133	0.0032681	0.104185
ENSG00000137673	MMP7	matrix metallopeptidase 7 (matrilysin, uterine) [Source:HGNC Symbol;Acc:7174]	331.43	1.80415	0.569433	3.16832	0.00153321	0.0709365
ENSG00000112394	SLC16A10	solute carrier family 16 (aromatic amino acid transporter), member 10 [Source:HGNC Symbol;Acc:17027]	108.894	1.7807	0.688533	2.58622	0.00970345	0.164912
ENSG00000125810	CD93	CD93 molecule [Source:HGNC Symbol;Acc:15855]	1340.94	1.77686	0.656666	2.70588	0.00681234	0.141151
ENSG00000060982	BCAT1	branched chain amino-acid transaminase 1, cytosolic [Source:HGNC Symbol;Acc:976]	167.964	1.77397	0.58725	3.02082	0.00252094	0.0940481
ENSG00000170989	S1PR1	sphingosine-1-phosphate receptor 1 [Source:HGNC Symbol;Acc:3165]	304.506	1.76818	0.664003	2.66291	0.00774674	0.151323
ENSG00000134802	SLC43A3	solute carrier family 43, member 3 [Source:HGNC Symbol;Acc:17466]	277.121	1.76497	0.633505	2.78604	0.00533558	0.12657
ENSG00000136305	CIDEB	cell death-inducing DFFA-like effector b [Source:HGNC Symbol;Acc:1977]	1004.34	1.75936	0.651875	2.69892	0.0069565	0.143457
ENSG00000136167	LCP1	lymphocyte cytosolic protein 1 (L-plastin) [Source:HGNC Symbol;Acc:6528]	3112.77	1.75698	0.595776	2.94907	0.00318736	0.103691
ENSG00000166923	GREM1	gremlin 1, DAN family BMP antagonist [Source:HGNC Symbol;Acc:2001]	1831.86	1.75343	0.6137	2.85714	0.00427477	0.115343
ENSG00000243466	IGKV1-5	immunoglobulin kappa variable 1-5 [Source:HGNC Symbol;Acc:5741]	12273.9	1.75275	0.652919	2.68449	0.00726413	0.146024
ENSG00000198814	GK	glycerol kinase [Source:HGNC Symbol;Acc:4289]	680.399	1.74739	0.580799	3.00859	0.00262463	0.0955586
ENSG00000211668	IGLV2-11	immunoglobulin lambda variable 2-11 [Source:HGNC Symbol;Acc:5887]	2027.74	1.73774	0.619779	2.80381	0.00505026	0.1236
ENSG00000224389	C4B	complement component 4B (Chido blood group) [Source:HGNC Symbol;Acc:1324]	58.2902	1.7271	0.648241	2.66428	0.00771526	0.151305
ENSG00000211938	IGHV3-7	immunoglobulin heavy variable 3-7 [Source:HGNC Symbol;Acc:5620]	8633.75	1.72684	0.623271	2.77062	0.00559503	0.130153
ENSG00000211945	IGHV1-18	immunoglobulin heavy variable 1-18 [Source:HGNC Symbol;Acc:5549]	2161.06	1.72447	0.631179	2.73214	0.00629241	0.138088
ENSG00000139329	LUM	lumican [Source:HGNC Symbol;Acc:6724]	2441.32	1.7197	0.634225	2.71149	0.00669814	0.140295
ENSG00000064989	CALCRL	calcitonin receptor-like [Source:HGNC Symbol;Acc:16709]	156.59	1.71475	0.595896	2.8776	0.00400716	0.113275
ENSG00000119917	IFIT3	interferon-induced protein with tetratricopeptide repeats 3 [Source:HGNC Symbol;Acc:5411]	692.248	1.71196	0.563555	3.03779	0.00238319	0.090986
ENSG00000179294	C17orf96	chromosome 17 open reading frame 96 [Source:HGNC Symbol;Acc:34493]	48.8826	1.70043	0.527118	3.2259	0.00125577	0.0612766
ENSG00000128918	ALDH1A2	aldehyde dehydrogenase 1 family, member A2 [Source:HGNC Symbol;Acc:15472]	145.417	1.69893	0.537028	3.16357	0.00155846	0.0713993
ENSG00000211625	IGKV3D-20	immunoglobulin kappa variable 3D-20 [Source:HGNC Symbol;Acc:5825]	380.823	1.69882	0.646381	2.62821	0.00858358	0.157649
ENSG00000182871	COL18A1	collagen, type XVIII, alpha 1 [Source:HGNC Symbol;Acc:2195]	2085.79	1.69718	0.613272	2.76743	0.00565006	0.130696
ENSG00000092621	PHGDH	phosphoglycerate dehydrogenase [Source:HGNC Symbol;Acc:8923]	127.754	1.69286	0.656492	2.57864	0.00991891	0.166213
ENSG00000159231	CBR3	carbonyl reductase 3 [Source:HGNC Symbol;Acc:1549]	80.9746	1.69234	0.554058	3.05444	0.00225481	0.0872971
ENSG00000211642	IGLV10-54	immunoglobulin lambda variable 10-54 [Source:HGNC Symbol;Acc:5884]	1211.64	1.68978	0.647997	2.60769	0.00911542	0.160792
ENSG00000182326	C1S	complement component 1, s subcomponent [Source:HGNC Symbol;Acc:1247]	3467.56	1.68323	0.534557	3.14883	0.00163924	0.0726775
ENSG00000211937	IGHV2-5	immunoglobulin heavy variable 2-5 [Source:HGNC Symbol;Acc:5576]	1730.14	1.67306	0.509469	3.28393	0.00102371	0.0536003
ENSG00000197249	SERPINA1	serpin peptidase inhibitor, clade A (alpha-1 antiproteinase, antitrypsin), member 1 [Source:HGNC Symbol;Acc:8941]	25016.8	1.66168	0.540222	3.07592	0.00209856	0.0834013
ENSG00000118523	CTGF	connective tissue growth factor [Source:HGNC Symbol;Acc:2500]	1139.71	1.63449	0.468772	3.48674	0.000488942	0.0347395
ENSG00000179776	CDH5	cadherin 5, type 2 (vascular endothelium) [Source:HGNC Symbol;Acc:1764]	536.593	1.63143	0.631036	2.58532	0.00972893	0.164912
ENSG00000149131	SERPING1	serpin peptidase inhibitor, clade G (C1 inhibitor), member 1 [Source:HGNC Symbol;Acc:1228]	4593.36	1.62602	0.52224	3.11354	0.00184856	0.0777761
ENSG00000110347	MMP12	matrix metallopeptidase 12 (macrophage elastase) [Source:HGNC Symbol;Acc:7158]	1142.11	1.62339	0.595839	2.72454	0.00643918	0.138766
ENSG00000174028	FAM3C2	family with sequence similarity 3, member C2 (pseudogene) [Source:HGNC Symbol;Acc:34501]	25.4515	1.6224	0.586806	2.7648	0.00569584	0.131164
ENSG00000196954	CASP4	caspase 4, apoptosis-related cysteine peptidase [Source:HGNC Symbol;Acc:1505]	1409.83	1.6059	0.612363	2.62247	0.00872946	0.158852
ENSG00000211677	IGLC2	immunoglobulin lambda constant 2 (Kern-Oz- marker) [Source:HGNC Symbol;Acc:5856]	20195.5	1.6057	0.511597	3.13859	0.0016976	0.0746629
ENSG00000156535	CD109	CD109 molecule [Source:HGNC Symbol;Acc:21685]	124.534	1.60305	0.546602	2.93275	0.00335976	0.104677
ENSG00000179862	CITED4	Cbp/p300-interacting transactivator, with Glu/Asp-rich carboxy-terminal domain, 4 [Source:HGNC Symbol;Acc:18696]	102.406	1.60245	0.542217	2.95536	0.00312308	0.103149
ENSG00000239951	IGKV3-20	immunoglobulin kappa variable 3-20 [Source:HGNC Symbol;Acc:5817]	9550.85	1.59711	0.605101	2.63941	0.008305	0.155867
ENSG00000084070	SMAP2	small ArfGAP2 [Source:HGNC Symbol;Acc:25082]	1512.42	1.59507	0.575502	2.77161	0.0055779	0.129938
ENSG00000118263	KLF7	Kruppel-like factor 7 (ubiquitous) [Source:HGNC Symbol;Acc:6350]	565.89	1.58565	0.608017	2.60791	0.00910967	0.160792
ENSG00000102524	TNFSF13B	tumor necrosis factor (ligand) superfamily, member 13b [Source:HGNC Symbol;Acc:11929]	398.689	1.58388	0.582543	2.71891	0.00654973	0.139251
ENSG00000243290	IGKV1-12	immunoglobulin kappa variable 1-12 [Source:HGNC Symbol;Acc:5730]	658.378	1.57904	0.604168	2.61359	0.00895974	0.160171
ENSG00000012660	ELOVL5	ELOVL fatty acid elongase 5 [Source:HGNC Symbol;Acc:21308]	784.093	1.57812	0.535079	2.94932	0.00318473	0.103691
ENSG00000011465	DCN	decorin [Source:HGNC Symbol;Acc:2705]	3841.79	1.57784	0.591963	2.66543	0.00768902	0.151042
ENSG00000143603	KCNN3	potassium intermediate/small conductance calcium-activated channel, subfamily N, member 3 [Source:HGNC Symbol;Acc:6292]	293.202	1.56464	0.578122	2.70641	0.00680145	0.141143
ENSG00000136859	ANGPTL2	angiopoietin-like 2 [Source:HGNC Symbol;Acc:490]	1114.95	1.56107	0.586568	2.66136	0.00778264	0.151326
ENSG00000106605	BLVRA	biliverdin reductase A [Source:HGNC Symbol;Acc:1062]	323.132	1.55991	0.589377	2.6467	0.00812803	0.154594
ENSG00000159403	C1R	complement component 1, r subcomponent [Source:HGNC Symbol;Acc:1246]	2675.59	1.54982	0.494833	3.13201	0.00173615	0.0757834
ENSG00000211685	IGLC7	immunoglobulin lambda constant 7 [Source:HGNC Symbol;Acc:5861]	893.166	1.54923	0.517923	2.99123	0.00277857	0.0975647
ENSG00000113083	LOX	lysyl oxidase [Source:HGNC Symbol;Acc:6664]	284.43	1.5377	0.514247	2.99021	0.00278788	0.0975647
ENSG00000099998	GGT5	gamma-glutamyltransferase 5 [Source:HGNC Symbol;Acc:4260]	291.181	1.53498	0.517823	2.9643	0.00303373	0.101491
ENSG00000122863	CHST3	carbohydrate (chondroitin 6) sulfotransferase 3 [Source:HGNC Symbol;Acc:1971]	120.264	1.5311	0.497008	3.08064	0.00206557	0.0830799
ENSG00000231475	IGHV4-31	immunoglobulin heavy variable 4-31 [Source:HGNC Symbol;Acc:5649]	893.411	1.52676	0.546088	2.79581	0.00517694	0.124907
ENSG00000254087	LYN	v-yes-1 Yamaguchi sarcoma viral related oncogene homolog [Source:HGNC Symbol;Acc:6735]	1658.42	1.52536	0.5208	2.92888	0.00340188	0.104677
ENSG00000139289	PHLDA1	pleckstrin homology-like domain, family A, member 1 [Source:HGNC Symbol;Acc:8933]	1548.25	1.51603	0.51623	2.93673	0.00331691	0.104433
ENSG00000168209	DDIT4	DNA-damage-inducible transcript 4 [Source:HGNC Symbol;Acc:24944]	1151.99	1.51596	0.534526	2.83608	0.00456708	0.118405
ENSG00000049768	FOXP3	forkhead box P3 [Source:HGNC Symbol;Acc:6106]	190.245	1.5139	0.564129	2.6836	0.00728338	0.146024
ENSG00000026025	VIM	vimentin [Source:HGNC Symbol;Acc:12692]	9348.07	1.49573	0.519444	2.87948	0.00398336	0.113109
ENSG00000087916	SLC6A14	solute carrier family 6 (amino acid transporter), member 14 [Source:HGNC Symbol;Acc:11047]	587.093	1.49344	0.451975	3.30425	0.000952292	0.0520685
ENSG00000026508	CD44	CD44 molecule (Indian blood group) [Source:HGNC Symbol;Acc:1681]	6022.73	1.48968	0.515814	2.88802	0.00387673	0.111781
ENSG00000071282	LMCD1	LIM and cysteine-rich domains 1 [Source:HGNC Symbol;Acc:6633]	207.857	1.4869	0.519563	2.86183	0.004212	0.115165
ENSG00000144476	ACKR3	atypical chemokine receptor 3 [Source:HGNC Symbol;Acc:23692]	201.543	1.4736	0.525191	2.80584	0.00501858	0.123422
ENSG00000163359	COL6A3	collagen, type VI, alpha 3 [Source:HGNC Symbol;Acc:2213]	4228.26	1.47359	0.522293	2.82139	0.00478163	0.12085
ENSG00000157601	MX1	myxovirus (influenza virus) resistance 1, interferon-inducible protein p78 (mouse) [Source:HGNC Symbol;Acc:7532]	752.318	1.47272	0.570738	2.58038	0.00986911	0.165755
ENSG00000211939	IGHV1-8	immunoglobulin heavy variable 1-8 [Source:HGNC Symbol;Acc:5559]	417.024	1.46884	0.443292	3.31349	0.000921385	0.051559
ENSG00000062282	DGAT2	diacylglycerol O-acyltransferase 2 [Source:HGNC Symbol;Acc:16940]	179.35	1.46381	0.53887	2.71643	0.00659892	0.140072
ENSG00000070190	DAPP1	dual adaptor of phosphotyrosine and 3-phosphoinositides [Source:HGNC Symbol;Acc:16500]	216.49	1.46126	0.496302	2.9443	0.00323691	0.104185
ENSG00000211934	IGHV1-2	immunoglobulin heavy variable 1-2 [Source:HGNC Symbol;Acc:5550]	2461.96	1.45827	0.538254	2.70927	0.0067432	0.140601
ENSG00000119946	CNNM1	cyclin M1 [Source:HGNC Symbol;Acc:102]	30.309	1.45436	0.540843	2.68906	0.00716541	0.14533
ENSG00000166147	FBN1	fibrillin 1 [Source:HGNC Symbol;Acc:3603]	752.305	1.45379	0.536215	2.71121	0.00670373	0.140295
ENSG00000196126	HLA-DRB1	major histocompatibility complex, class II, DR beta 1 [Source:HGNC Symbol;Acc:4948]	6653.45	1.45352	0.537932	2.70205	0.00689126	0.142428
ENSG00000077943	ITGA8	integrin, alpha 8 [Source:HGNC Symbol;Acc:6144]	344.134	1.44863	0.394589	3.67125	0.000241367	0.0224907
ENSG00000100342	APOL1	apolipoprotein L, 1 [Source:HGNC Symbol;Acc:618]	1974.53	1.44782	0.538866	2.6868	0.00721403	0.145454
ENSG00000164111	ANXA5	annexin A5 [Source:HGNC Symbol;Acc:543]	3321.28	1.44431	0.478463	3.01864	0.00253908	0.0941367
ENSG00000100644	HIF1A	hypoxia inducible factor 1, alpha subunit (basic helix-loop-helix transcription factor) [Source:HGNC Symbol;Acc:4910]	4595.91	1.43977	0.503976	2.85683	0.00427897	0.115343
ENSG00000204287	HLA-DRA	major histocompatibility complex, class II, DR alpha [Source:HGNC Symbol;Acc:4947]	7617.52	1.43514	0.506549	2.83316	0.00460898	0.118405
ENSG00000167703	SLC43A2	solute carrier family 43 (amino acid system L transporter), member 2 [Source:HGNC Symbol;Acc:23087]	1107.78	1.43245	0.461468	3.10411	0.00190853	0.0788907
ENSG00000211964	IGHV3-48	immunoglobulin heavy variable 3-48 [Source:HGNC Symbol;Acc:5606]	2106.6	1.42823	0.552294	2.58599	0.00970996	0.164912
ENSG00000085117	CD82	CD82 molecule [Source:HGNC Symbol;Acc:6210]	1094.25	1.42599	0.548952	2.59767	0.00938594	0.163464
ENSG00000133574	GIMAP4	GTPase, IMAP family member 4 [Source:HGNC Symbol;Acc:21872]	582.134	1.42335	0.552287	2.5772	0.00996047	0.166225
ENSG00000162645	GBP2	guanylate binding protein 2, interferon-inducible [Source:HGNC Symbol;Acc:4183]	1849.42	1.41741	0.535454	2.64712	0.00811798	0.154594
ENSG00000166173	LARP6	La ribonucleoprotein domain family, member 6 [Source:HGNC Symbol;Acc:24012]	64.3537	1.41224	0.539605	2.61718	0.00886595	0.159726
ENSG00000147689	FAM83A	family with sequence similarity 83, member A [Source:HGNC Symbol;Acc:28210]	70.7255	1.41074	0.523861	2.69297	0.00708191	0.144378
ENSG00000188641	DPYD	dihydropyrimidine dehydrogenase [Source:HGNC Symbol;Acc:3012]	306.564	1.40569	0.537326	2.61609	0.00889422	0.159726
ENSG00000013016	EHD3	EH-domain containing 3 [Source:HGNC Symbol;Acc:3244]	158.406	1.40505	0.488593	2.8757	0.0040313	0.113655
ENSG00000186818	LILRB4	leukocyte immunoglobulin-like receptor, subfamily B (with TM and ITIM domains), member 4 [Source:HGNC Symbol;Acc:6608]	544.964	1.39849	0.521498	2.68168	0.0073253	0.14609
ENSG00000117114	LPHN2	latrophilin 2 [Source:HGNC Symbol;Acc:18582]	418.725	1.39404	0.512171	2.72182	0.00649238	0.139024
ENSG00000165507	C10orf10	chromosome 10 open reading frame 10 [Source:HGNC Symbol;Acc:23355]	448.093	1.39304	0.501738	2.77643	0.00549589	0.129491
ENSG00000173269	MMRN2	multimerin 2 [Source:HGNC Symbol;Acc:19888]	185.762	1.3886	0.527922	2.63032	0.00853048	0.157035
ENSG00000211953	IGHV3-30	immunoglobulin heavy variable 3-30 [Source:HGNC Symbol;Acc:5591]	2354.86	1.38858	0.531804	2.61108	0.00902567	0.16041
ENSG00000169908	TM4SF1	transmembrane 4 L six family member 1 [Source:HGNC Symbol;Acc:11853]	1219.69	1.38518	0.514719	2.69114	0.00712079	0.144813
ENSG00000232216	IGHV3-43	immunoglobulin heavy variable 3-43 [Source:HGNC Symbol;Acc:5604]	680.313	1.37495	0.46845	2.9351	0.00333443	0.104553
ENSG00000211966	IGHV5-51	immunoglobulin heavy variable 5-51 [Source:HGNC Symbol;Acc:5659]	4707.93	1.37472	0.527077	2.6082	0.00910201	0.160792
ENSG00000198535	C2CD4A	C2 calcium-dependent domain containing 4A [Source:HGNC Symbol;Acc:33627]	106.292	1.35403	0.436123	3.1047	0.0019047	0.0788907
ENSG00000136842	TMOD1	tropomodulin 1 [Source:HGNC Symbol;Acc:11871]	62.8641	1.34891	0.487099	2.76928	0.00561803	0.130505
ENSG00000140279	DUOX2	dual oxidase 2 [Source:HGNC Symbol;Acc:13273]	7385.1	1.34319	0.455559	2.94844	0.00319379	0.103691
ENSG00000135472	FAIM2	Fas apoptotic inhibitory molecule 2 [Source:HGNC Symbol;Acc:17067]	83.4295	1.34216	0.517919	2.59146	0.00955707	0.163972
ENSG00000091436		Mitogen-activated protein kinase kinase kinase MLT [Source:UniProtKB/Swiss-Prot;Acc:Q9NYL2]	581.721	1.33407	0.466083	2.8623	0.00420573	0.115165
ENSG00000100219	XBP1	X-box binding protein 1 [Source:HGNC Symbol;Acc:12801]	7845.72	1.3337	0.473823	2.81477	0.00488121	0.12161
ENSG00000103811	CTSH	cathepsin H [Source:HGNC Symbol;Acc:2535]	1992.78	1.33234	0.494044	2.6968	0.00700086	0.143777
ENSG00000244575	IGKV1-27	immunoglobulin kappa variable 1-27 [Source:HGNC Symbol;Acc:5735]	1004.76	1.33	0.465068	2.85979	0.00423915	0.115165
ENSG00000143387	CTSK	cathepsin K [Source:HGNC Symbol;Acc:2536]	692.61	1.32881	0.493257	2.69395	0.00706097	0.14413
ENSG00000166401	SERPINB8	serpin peptidase inhibitor, clade B (ovalbumin), member 8 [Source:HGNC Symbol;Acc:8952]	296.344	1.32341	0.505988	2.6155	0.00890971	0.159726
ENSG00000211955	IGHV3-33	immunoglobulin heavy variable 3-33 [Source:HGNC Symbol;Acc:5596]	1239.58	1.29212	0.483562	2.67208	0.00753818	0.149073
ENSG00000167397	VKORC1	vitamin K epoxide reductase complex, subunit 1 [Source:HGNC Symbol;Acc:23663]	469.27	1.28688	0.43702	2.94467	0.00323302	0.104185
ENSG00000171115	GIMAP8	GTPase, IMAP family member 8 [Source:HGNC Symbol;Acc:21792]	307.874	1.26584	0.431771	2.93175	0.00337062	0.104677
ENSG00000116962	NID1	nidogen 1 [Source:HGNC Symbol;Acc:7821]	1650.12	1.25797	0.453795	2.77212	0.00556933	0.129922
ENSG00000069869	NEDD4	neural precursor cell expressed, developmentally down-regulated 4, E3 ubiquitin protein ligase [Source:HGNC Symbol;Acc:7727]	270.478	1.25129	0.448547	2.78964	0.00527662	0.126078
ENSG00000180611	MB21D2	Mab-21 domain containing 2 [Source:HGNC Symbol;Acc:30438]	121.274	1.24351	0.432089	2.87791	0.00400318	0.113275
ENSG00000211648	IGLV1-47	immunoglobulin lambda variable 1-47 [Source:HGNC Symbol;Acc:5880]	1967.24	1.21882	0.463378	2.6303	0.00853107	0.157035
ENSG00000116285	ERRFI1	ERBB receptor feedback inhibitor 1 [Source:HGNC Symbol;Acc:18185]	711.415	1.20707	0.366447	3.294	0.000987741	0.052551
ENSG00000174705	SH3PXD2B	SH3 and PX domains 2B [Source:HGNC Symbol;Acc:29242]	771.713	1.19981	0.449629	2.66845	0.00762026	0.150336
ENSG00000112984	KIF20A	kinesin family member 20A [Source:HGNC Symbol;Acc:9787]	193.903	1.19066	0.372771	3.19409	0.00140273	0.0666396
ENSG00000205502	C2CD4B	C2 calcium-dependent domain containing 4B [Source:HGNC Symbol;Acc:33628]	133.573	1.18924	0.434981	2.734	0.00625697	0.137946
ENSG00000214748			277.726	1.18586	0.397988	2.97965	0.00288577	0.0987447
ENSG00000134853	PDGFRA	platelet-derived growth factor receptor, alpha polypeptide [Source:HGNC Symbol;Acc:8803]	953.871	1.17769	0.419579	2.80684	0.005003	0.123422
ENSG00000155760	FZD7	frizzled family receptor 7 [Source:HGNC Symbol;Acc:4045]	123.247	1.16859	0.44293	2.63832	0.00833187	0.155867
ENSG00000162407	PPAP2B	phosphatidic acid phosphatase type 2B [Source:HGNC Symbol;Acc:9229]	608.817	1.16699	0.422753	2.76045	0.00577214	0.131762
ENSG00000155755	TMEM237	transmembrane protein 237 [Source:HGNC Symbol;Acc:14432]	91.7426	1.15604	0.445692	2.59381	0.00949181	0.163754
ENSG00000114268	PFKFB4	6-phosphofructo-2-kinase/fructose-2,6-biphosphatase 4 [Source:HGNC Symbol;Acc:8875]	208.825	1.14348	0.429748	2.66082	0.00779501	0.151326
ENSG00000176973	FAM89B	family with sequence similarity 89, member B [Source:HGNC Symbol;Acc:16708]	349.66	1.14107	0.432085	2.64084	0.00827016	0.155553
ENSG00000180398	MCFD2	multiple coagulation factor deficiency 2 [Source:HGNC Symbol;Acc:18451]	826.296	1.13906	0.418545	2.72148	0.00649897	0.139024
ENSG00000226479	TMEM185B	transmembrane protein 185B [Source:HGNC Symbol;Acc:18896]	291.202	1.13896	0.337901	3.3707	0.000749778	0.0452758
ENSG00000074695	LMAN1	lectin, mannose-binding, 1 [Source:HGNC Symbol;Acc:6631]	3255.35	1.13501	0.359957	3.15317	0.00161507	0.0721182
ENSG00000134326	CMPK2	cytidine monophosphate (UMP-CMP) kinase 2, mitochondrial [Source:HGNC Symbol;Acc:27015]	264.524	1.12589	0.433652	2.59629	0.00942365	0.163464
ENSG00000147416	ATP6V1B2	ATPase, H transporting, lysosomal 56/58kDa, V1 subunit B2 [Source:HGNC Symbol;Acc:854]	1485.62	1.12232	0.364283	3.0809	0.00206377	0.0830799
ENSG00000158714	SLAMF8	SLAM family member 8 [Source:HGNC Symbol;Acc:21391]	519.854	1.11063	0.393987	2.81895	0.00481805	0.121342
ENSG00000082397	EPB41L3	erythrocyte membrane protein band 4.1-like 3 [Source:HGNC Symbol;Acc:3380]	1749.35	1.1098	0.337523	3.28805	0.00100882	0.052989
ENSG00000105926	MPP6	membrane protein, palmitoylated 6 (MAGUK p55 subfamily member 6) [Source:HGNC Symbol;Acc:18167]	100.253	1.03631	0.368914	2.80909	0.00496817	0.123033
ENSG00000231389	HLA-DPA1	major histocompatibility complex, class II, DP alpha 1 [Source:HGNC Symbol;Acc:4938]	1556.9	1.03176	0.392182	2.63082	0.00851799	0.157035
ENSG00000228887	EEF1DP1	eukaryotic translation elongation factor 1 delta pseudogene 1 [Source:HGNC Symbol;Acc:32474]	65.5288	1.02492	0.380832	2.69126	0.00711823	0.144813
ENSG00000083444	PLOD1	procollagen-lysine, 2-oxoglutarate 5-dioxygenase 1 [Source:HGNC Symbol;Acc:9081]	1220.34	1.02422	0.362857	2.82266	0.00476275	0.120689
ENSG00000182158	CREB3L2	cAMP responsive element binding protein 3-like 2 [Source:HGNC Symbol;Acc:23720]	4462.99	1.02068	0.34731	2.93882	0.00329464	0.104185
ENSG00000165732	DDX21	DEAD (Asp-Glu-Ala-Asp) box helicase 21 [Source:HGNC Symbol;Acc:2744]	1724.49	1.01388	0.30514	3.32266	0.000891621	0.0508596
ENSG00000135677	GNS	glucosamine (N-acetyl)-6-sulfatase [Source:HGNC Symbol;Acc:4422]	1229.66	1.00282	0.365378	2.74463	0.00605799	0.135267
ENSG00000170191	NANP	N-acetylneuraminic acid phosphatase [Source:HGNC Symbol;Acc:16140]	80.4685	1.00079	0.349489	2.86359	0.00418868	0.115165
ENSG00000139514	SLC7A1	solute carrier family 7 (cationic amino acid transporter, y system), member 1 [Source:HGNC Symbol;Acc:11057]	1868.43	0.995456	0.29431	3.38234	0.000718707	0.0440655
ENSG00000103381	CPPED1	calcineurin-like phosphoesterase domain containing 1 [Source:HGNC Symbol;Acc:25632]	455.752	0.992482	0.378744	2.62046	0.00878112	0.158976
ENSG00000044574	HSPA5	heat shock 70kDa protein 5 (glucose-regulated protein, 78kDa) [Source:HGNC Symbol;Acc:5238]	10951.2	0.991388	0.359809	2.75532	0.00586355	0.132611
ENSG00000096384	HSP90AB1	heat shock protein 90kDa alpha (cytosolic), class B member 1 [Source:HGNC Symbol;Acc:5258]	7355.27	0.988464	0.219285	4.50766	6.55467e-06	0.00171597
ENSG00000121073	SLC35B1	solute carrier family 35, member B1 [Source:HGNC Symbol;Acc:20798]	1004.26	0.977345	0.337883	2.89255	0.00382127	0.111088
ENSG00000163521	GLB1L	galactosidase, beta 1-like [Source:HGNC Symbol;Acc:28129]	94.8812	0.963096	0.361094	2.66717	0.0076494	0.150731
ENSG00000137752	CASP1	caspase 1, apoptosis-related cysteine peptidase [Source:HGNC Symbol;Acc:1499]	2498.28	0.955501	0.327931	2.91373	0.00357144	0.107329
ENSG00000175879	HOXD8	homeobox D8 [Source:HGNC Symbol;Acc:5139]	133.811	0.954066	0.354126	2.69414	0.00705709	0.14413
ENSG00000138678	AGPAT9	1-acylglycerol-3-phosphate O-acyltransferase 9 [Source:HGNC Symbol;Acc:28157]	492.593	0.928852	0.319774	2.90471	0.00367592	0.1092
ENSG00000169071	ROR2	receptor tyrosine kinase-like orphan receptor 2 [Source:HGNC Symbol;Acc:10257]	150.808	0.925181	0.349366	2.64817	0.00809281	0.154571
ENSG00000004866	ST7	suppression of tumorigenicity 7 [Source:HGNC Symbol;Acc:11351]	338.763	0.918444	0.31654	2.90151	0.00371372	0.1092
ENSG00000134107	BHLHE40	basic helix-loop-helix family, member e40 [Source:HGNC Symbol;Acc:1046]	1641.49	0.915125	0.313346	2.92049	0.00349479	0.106245
ENSG00000118971	CCND2	cyclin D2 [Source:HGNC Symbol;Acc:1583]	4860.82	0.912051	0.303514	3.00497	0.00265608	0.0962784
ENSG00000017483	SLC38A5	solute carrier family 38, member 5 [Source:HGNC Symbol;Acc:18070]	459.783	0.888816	0.325144	2.7336	0.00626456	0.137946
ENSG00000113368	LMNB1	lamin B1 [Source:HGNC Symbol;Acc:6637]	1571.03	0.88408	0.339339	2.6053	0.00917946	0.16106
ENSG00000104375	STK3	serine/threonine kinase 3 [Source:HGNC Symbol;Acc:11406]	269.374	0.883842	0.306955	2.87939	0.0039845	0.113109
ENSG00000196072	BLOC1S2	biogenesis of lysosomal organelles complex-1, subunit 2 [Source:HGNC Symbol;Acc:20984]	350.721	0.878698	0.310631	2.82875	0.00467299	0.119676
ENSG00000137168	PPIL1	peptidylprolyl isomerase (cyclophilin)-like 1 [Source:HGNC Symbol;Acc:9260]	349.899	0.872465	0.299444	2.91362	0.00357266	0.107329
ENSG00000128059	PPAT	phosphoribosyl pyrophosphate amidotransferase [Source:HGNC Symbol;Acc:9238]	122.661	0.872305	0.338294	2.57854	0.00992184	0.166213
ENSG00000160710	ADAR	adenosine deaminase, RNA-specific [Source:HGNC Symbol;Acc:225]	5186.52	0.872082	0.30937	2.81889	0.00481897	0.121342
ENSG00000166197	NOLC1	nucleolar and coiled-body phosphoprotein 1 [Source:HGNC Symbol;Acc:15608]	1384.13	0.867558	0.23306	3.72247	0.000197286	0.0194331
ENSG00000067225	PKM	pyruvate kinase, muscle [Source:HGNC Symbol;Acc:9021]	12216.9	0.865361	0.27351	3.1639	0.00155668	0.0713993
ENSG00000100031	GGT1	gamma-glutamyltransferase 1 [Source:HGNC Symbol;Acc:4250]	369.767	0.852948	0.281286	3.03231	0.00242689	0.0918435
ENSG00000134333	LDHA	lactate dehydrogenase A [Source:HGNC Symbol;Acc:6535]	12451.6	0.848501	0.249092	3.40638	0.000658306	0.0421908
ENSG00000083168	KAT6A	K(lysine) acetyltransferase 6A [Source:HGNC Symbol;Acc:13013]	1997.85	0.843265	0.292525	2.88271	0.00394267	0.112698
ENSG00000142657	PGD	phosphogluconate dehydrogenase [Source:HGNC Symbol;Acc:8891]	2229.46	0.837647	0.248546	3.37019	0.000751157	0.0452758
ENSG00000090861	AARS	alanyl-tRNA synthetase [Source:HGNC Symbol;Acc:20]	1020.91	0.837163	0.310348	2.6975	0.00698624	0.143671
ENSG00000154734	ADAMTS1	ADAM metallopeptidase with thrombospondin type 1 motif, 1 [Source:HGNC Symbol;Acc:217]	342.285	0.835888	0.299502	2.79092	0.00525579	0.125874
ENSG00000180370	PAK2	p21 protein (Cdc42/Rac)-activated kinase 2 [Source:HGNC Symbol;Acc:8591]	1651.5	0.807718	0.31228	2.58651	0.00969523	0.164912
ENSG00000104635	SLC39A14	solute carrier family 39 (zinc transporter), member 14 [Source:HGNC Symbol;Acc:20858]	2022.4	0.806888	0.284638	2.83479	0.00458556	0.118405
ENSG00000187653	TMSB4XP8	thymosin beta 4, X-linked pseudogene 8 [Source:HGNC Symbol;Acc:11885]	2260.61	0.800187	0.241843	3.3087	0.000937303	0.0518756
ENSG00000022277	RTFDC1	replication termination factor 2 domain containing 1 [Source:HGNC Symbol;Acc:15890]	903.102	0.788201	0.239712	3.28812	0.0010086	0.052989
ENSG00000156261	CCT8	chaperonin containing TCP1, subunit 8 (theta) [Source:HGNC Symbol;Acc:1623]	1696	0.784493	0.263504	2.97715	0.00290938	0.0991412
ENSG00000256043	CTSO	cathepsin O [Source:HGNC Symbol;Acc:2542]	612.247	0.779216	0.2982	2.61307	0.00897341	0.160171
ENSG00000118363	SPCS2	signal peptidase complex subunit 2 homolog (S. cerevisiae) [Source:HGNC Symbol;Acc:28962]	1084.4	0.777547	0.29717	2.61651	0.00888345	0.159726
ENSG00000138303	ASCC1	activating signal cointegrator 1 complex subunit 1 [Source:HGNC Symbol;Acc:24268]	214.754	0.776338	0.295285	2.62911	0.0085608	0.157406
ENSG00000172269	DPAGT1	dolichyl-phosphate (UDP-N-acetylglucosamine) N-acetylglucosaminephosphotransferase 1 (GlcNAc-1-P transferase) [Source:HGNC Symbol;Acc:2995]	799.956	0.77566	0.271064	2.86153	0.00421598	0.115165
ENSG00000205339	IPO7	importin 7 [Source:HGNC Symbol;Acc:9852]	1550.14	0.774534	0.261462	2.96231	0.00305336	0.101735
ENSG00000117519	CNN3	calponin 3, acidic [Source:HGNC Symbol;Acc:2157]	1322.98	0.762078	0.288806	2.63872	0.00832189	0.155867
ENSG00000173744	AGFG1	ArfGAP with FG repeats 1 [Source:HGNC Symbol;Acc:5175]	1143.89	0.761961	0.254899	2.98927	0.00279647	0.0975647
ENSG00000165417	GTF2A1	general transcription factor IIA, 1, 19/37kDa [Source:HGNC Symbol;Acc:4646]	623.267	0.758062	0.294172	2.57694	0.00996799	0.166225
ENSG00000115053	NCL	nucleolin [Source:HGNC Symbol;Acc:7667]	9711.56	0.753701	0.215796	3.49266	0.000478244	0.034444
ENSG00000137947	GTF2B	general transcription factor IIB [Source:HGNC Symbol;Acc:4648]	450.576	0.745271	0.23588	3.15953	0.00158024	0.0717987
ENSG00000124374	PAIP2B	poly(A) binding protein interacting protein 2B [Source:HGNC Symbol;Acc:29200]	202.611	0.740973	0.281171	2.63532	0.00840591	0.156654
ENSG00000111641	NOP2	NOP2 nucleolar protein [Source:HGNC Symbol;Acc:7867]	477.996	0.736286	0.239241	3.07759	0.00208679	0.0831811
ENSG00000110063	DCPS	decapping enzyme, scavenger [Source:HGNC Symbol;Acc:29812]	287.024	0.726778	0.263933	2.75364	0.00589361	0.132973
ENSG00000198301	SDAD1	SDA1 domain containing 1 [Source:HGNC Symbol;Acc:25537]	513.573	0.723224	0.257836	2.80498	0.00503197	0.123501
ENSG00000158417	EIF5B	eukaryotic translation initiation factor 5B [Source:HGNC Symbol;Acc:30793]	3047.05	0.722733	0.22016	3.28276	0.00102796	0.0536524
ENSG00000174238	PITPNA	phosphatidylinositol transfer protein, alpha [Source:HGNC Symbol;Acc:9001]	1830.87	0.721486	0.246915	2.922	0.00347791	0.106225
ENSG00000145220	LYAR	Ly1 antibody reactive [Source:HGNC Symbol;Acc:26021]	318.192	0.716363	0.278027	2.5766	0.00997771	0.166225
ENSG00000171617	ENC1	ectodermal-neural cortex 1 (with BTB domain) [Source:HGNC Symbol;Acc:3345]	582.972	0.713186	0.275168	2.59182	0.00954685	0.163972
ENSG00000157020	SEC13	SEC13 homolog (S. cerevisiae) [Source:HGNC Symbol;Acc:10697]	2644.92	0.711964	0.231201	3.07941	0.00207408	0.0830799
ENSG00000149136	SSRP1	structure specific recognition protein 1 [Source:HGNC Symbol;Acc:11327]	1684.72	0.704201	0.268666	2.6211	0.00876462	0.158852
ENSG00000136628	EPRS	glutamyl-prolyl-tRNA synthetase [Source:HGNC Symbol;Acc:3418]	1126.52	0.698294	0.24317	2.87164	0.00408354	0.114317
ENSG00000150961	SEC24D	SEC24 family member D [Source:HGNC Symbol;Acc:10706]	1994.07	0.698042	0.221105	3.15707	0.00159365	0.0720013
ENSG00000143799	PARP1	poly (ADP-ribose) polymerase 1 [Source:HGNC Symbol;Acc:270]	1661.85	0.69784	0.238587	2.92489	0.00344577	0.105438
ENSG00000134910	STT3A	STT3A, subunit of the oligosaccharyltransferase complex (catalytic) [Source:HGNC Symbol;Acc:6172]	2412.22	0.692205	0.238456	2.90286	0.00369772	0.1092
ENSG00000095139	ARCN1	archain 1 [Source:HGNC Symbol;Acc:649]	3139.98	0.690749	0.204059	3.38505	0.000711653	0.0439599
ENSG00000115761	NOL10	nucleolar protein 10 [Source:HGNC Symbol;Acc:25862]	363.225	0.689444	0.243854	2.82728	0.00469449	0.120041
ENSG00000090487	SPG21	spastic paraplegia 21 (autosomal recessive, Mast syndrome) [Source:HGNC Symbol;Acc:20373]	849.721	0.683135	0.256614	2.66212	0.00776513	0.151323
ENSG00000127022	CANX	calnexin [Source:HGNC Symbol;Acc:1473]	9810.43	0.676354	0.207278	3.26303	0.00110228	0.0562845
ENSG00000196743	GM2A	GM2 ganglioside activator [Source:HGNC Symbol;Acc:4367]	1504.51	0.67236	0.251536	2.67302	0.00751721	0.149073
ENSG00000102900	NUP93	nucleoporin 93kDa [Source:HGNC Symbol;Acc:28958]	398.712	0.670748	0.257987	2.59993	0.00932418	0.162894
ENSG00000088205	DDX18	DEAD (Asp-Glu-Ala-Asp) box polypeptide 18 [Source:HGNC Symbol;Acc:2741]	731.72	0.669056	0.254144	2.63259	0.00847374	0.157035
ENSG00000138674	SEC31A	SEC31 homolog A (S. cerevisiae) [Source:HGNC Symbol;Acc:17052]	3451.83	0.668517	0.228885	2.92075	0.00349189	0.106245
ENSG00000108582	CPD	carboxypeptidase D [Source:HGNC Symbol;Acc:2301]	2106.62	0.659892	0.24028	2.74635	0.00602628	0.135043
ENSG00000134684	YARS	tyrosyl-tRNA synthetase [Source:HGNC Symbol;Acc:12840]	949.009	0.655885	0.221972	2.95481	0.00312865	0.103149
ENSG00000171793	CTPS1	CTP synthase 1 [Source:HGNC Symbol;Acc:2519]	321.415	0.65416	0.253498	2.58053	0.0098649	0.165755
ENSG00000140350	ANP32A	acidic (leucine-rich) nuclear phosphoprotein 32 family, member A [Source:HGNC Symbol;Acc:13233]	2162.74	0.649378	0.216548	2.99878	0.00271065	0.097142
ENSG00000143436	MRPL9	mitochondrial ribosomal protein L9 [Source:HGNC Symbol;Acc:14277]	478.919	0.643678	0.233358	2.75833	0.00580973	0.132348
ENSG00000125686	MED1	mediator complex subunit 1 [Source:HGNC Symbol;Acc:9234]	848.215	0.642341	0.244042	2.63209	0.00848604	0.157035
ENSG00000148248	SURF4	surfeit 4 [Source:HGNC Symbol;Acc:11476]	4360.83	0.641943	0.243354	2.6379	0.00834206	0.155867
ENSG00000099783	HNRNPM	heterogeneous nuclear ribonucleoprotein M [Source:HGNC Symbol;Acc:5046]	3558.53	0.640517	0.24145	2.65279	0.00798294	0.153294
ENSG00000115677	HDLBP	high density lipoprotein binding protein [Source:HGNC Symbol;Acc:4857]	8666.44	0.638935	0.206813	3.08944	0.00200537	0.0818676
ENSG00000108270	AATF	apoptosis antagonizing transcription factor [Source:HGNC Symbol;Acc:19235]	890.181	0.636578	0.246441	2.58308	0.00979218	0.16521
ENSG00000116903	EXOC8	exocyst complex component 8 [Source:HGNC Symbol;Acc:24659]	314.241	0.632701	0.238506	2.65277	0.00798343	0.153294
ENSG00000125870	SNRPB2	small nuclear ribonucleoprotein polypeptide B [Source:HGNC Symbol;Acc:11155]	1136.05	0.610915	0.213571	2.86048	0.00423002	0.115165
ENSG00000079246	XRCC5	X-ray repair complementing defective repair in Chinese hamster cells 5 (double-strand-break rejoining) [Source:HGNC Symbol;Acc:12833]	3141.1	0.595067	0.228384	2.60555	0.00917265	0.16106
ENSG00000169564	PCBP1	poly(rC) binding protein 1 [Source:HGNC Symbol;Acc:8647]	5860.5	0.584928	0.198828	2.94188	0.00326232	0.104185
ENSG00000087365	SF3B2	splicing factor 3b, subunit 2, 145kDa [Source:HGNC Symbol;Acc:10769]	2420.92	0.572333	0.218766	2.61618	0.00889186	0.159726
ENSG00000096401	CDC5L	cell division cycle 5-like [Source:HGNC Symbol;Acc:1743]	728.312	0.564655	0.218279	2.58685	0.0096858	0.164912
ENSG00000137504	CREBZF	CREB/ATF bZIP transcription factor [Source:HGNC Symbol;Acc:24905]	633.236	-0.610014	0.226934	-2.68806	0.00718681	0.145438
ENSG00000101199	ARFGAP1	ADP-ribosylation factor GTPase activating protein 1 [Source:HGNC Symbol;Acc:15852]	830.617	-0.633127	0.237547	-2.66527	0.00769266	0.151042
ENSG00000157873	TNFRSF14	tumor necrosis factor receptor superfamily, member 14 [Source:HGNC Symbol;Acc:11912]	1660.59	-0.634149	0.24483	-2.59016	0.00959321	0.1643
ENSG00000169567	HINT1	histidine triad nucleotide binding protein 1 [Source:HGNC Symbol;Acc:4912]	8012.01	-0.649607	0.246949	-2.63053	0.00852507	0.157035
ENSG00000160813	PPP1R35	protein phosphatase 1, regulatory subunit 35 [Source:HGNC Symbol;Acc:28320]	590.478	-0.655967	0.223213	-2.93875	0.00329537	0.104185
ENSG00000141994	DUS3L	dihydrouridine synthase 3-like (S. cerevisiae) [Source:HGNC Symbol;Acc:26920]	236.486	-0.671259	0.259053	-2.5912	0.00956414	0.163972
ENSG00000078596	ITM2A	integral membrane protein 2A [Source:HGNC Symbol;Acc:6173]	357.034	-0.68621	0.242834	-2.82584	0.00471575	0.120196
ENSG00000197530	MIB2	mindbomb E3 ubiquitin protein ligase 2 [Source:HGNC Symbol;Acc:30577]	473.045	-0.695985	0.268522	-2.59191	0.00954444	0.163972
ENSG00000269900	RMRP	RNA component of mitochondrial RNA processing endoribonuclease [Source:HGNC Symbol;Acc:10031]	35540.5	-0.710071	0.274909	-2.58293	0.0097966	0.16521
ENSG00000269821	KCNQ1OT1	KCNQ1 opposite strand/antisense transcript 1 (non-protein coding) [Source:HGNC Symbol;Acc:6295]	542.414	-0.725281	0.249518	-2.90673	0.00365227	0.108927
ENSG00000146830	GIGYF1	GRB10 interacting GYF protein 1 [Source:HGNC Symbol;Acc:9126]	596.318	-0.733038	0.255083	-2.87373	0.00405662	0.113971
ENSG00000125503	PPP1R12C	protein phosphatase 1, regulatory subunit 12C [Source:HGNC Symbol;Acc:14947]	1541.96	-0.745616	0.28616	-2.60559	0.00917168	0.16106
ENSG00000175309	PHYKPL	5-phosphohydroxy-L-lysine phospho-lyase [Source:HGNC Symbol;Acc:28249]	1117.57	-0.750478	0.285816	-2.62573	0.00864622	0.158447
ENSG00000141258	SGSM2	small G protein signaling modulator 2 [Source:HGNC Symbol;Acc:29026]	452.583	-0.752685	0.279785	-2.69022	0.00714047	0.145034
ENSG00000172172	MRPL13	mitochondrial ribosomal protein L13 [Source:HGNC Symbol;Acc:14278]	921.325	-0.752907	0.284333	-2.64798	0.00809743	0.154571
ENSG00000064607	SUGP2	SURP and G patch domain containing 2 [Source:HGNC Symbol;Acc:18641]	772.34	-0.754724	0.279649	-2.69883	0.00695844	0.143457
ENSG00000155256	ZFYVE27	zinc finger, FYVE domain containing 27 [Source:HGNC Symbol;Acc:26559]	456.794	-0.763647	0.274195	-2.78505	0.00535192	0.126642
ENSG00000185596	WASH3P	WAS protein family homolog 3 pseudogene [Source:HGNC Symbol;Acc:24362]	344.533	-0.764804	0.267733	-2.85659	0.00428216	0.115343
ENSG00000213983	AP1G2	adaptor-related protein complex 1, gamma 2 subunit [Source:HGNC Symbol;Acc:556]	1327.16	-0.764865	0.294668	-2.59569	0.00944025	0.163464
ENSG00000129968	ABHD17A	abhydrolase domain containing 17A [Source:HGNC Symbol;Acc:28756]	733.219	-0.772524	0.291783	-2.64759	0.00810669	0.154571
ENSG00000235194	PPP1R3E	protein phosphatase 1, regulatory subunit 3E [Source:HGNC Symbol;Acc:14943]	179.803	-0.782971	0.288804	-2.71108	0.00670651	0.140295
ENSG00000010327	STAB1	stabilin 1 [Source:HGNC Symbol;Acc:18628]	1509.8	-0.785124	0.231052	-3.39804	0.000678715	0.0429918
ENSG00000242125	SNHG3	small nucleolar RNA host gene 3 (non-protein coding) [Source:HGNC Symbol;Acc:10118]	326.373	-0.796133	0.266859	-2.98334	0.00285117	0.0983774
ENSG00000197912	SPG7	spastic paraplegia 7 (pure and complicated autosomal recessive) [Source:HGNC Symbol;Acc:11237]	875.557	-0.797258	0.292553	-2.72518	0.00642668	0.138766
ENSG00000198496	NBR2	neighbor of BRCA1 gene 2 (non-protein coding) [Source:HGNC Symbol;Acc:20691]	110.175	-0.803802	0.306392	-2.62344	0.00870468	0.158852
ENSG00000163682	RPL9	ribosomal protein L9 [Source:HGNC Symbol;Acc:10369]	18649.4	-0.804781	0.272479	-2.95355	0.00314137	0.103208
ENSG00000266402	SNORA76	small nucleolar RNA, H/ACA box 76 [Source:HGNC Symbol;Acc:32662]	1922.34	-0.806478	0.233496	-3.45392	0.000552494	0.0374038
ENSG00000135951	TSGA10	testis specific, 10 [Source:HGNC Symbol;Acc:14927]	107.858	-0.814539	0.315492	-2.58181	0.0098285	0.165419
ENSG00000130332	LSM7	LSM7 homolog, U6 small nuclear RNA associated (S. cerevisiae) [Source:HGNC Symbol;Acc:20470]	1983.4	-0.815419	0.296823	-2.74716	0.0060114	0.134893
ENSG00000198695	MT-ND6	mitochondrially encoded NADH dehydrogenase 6 [Source:HGNC Symbol;Acc:7462]	32191.5	-0.818344	0.287155	-2.84983	0.00437428	0.115802
ENSG00000148341	SH3GLB2	SH3-domain GRB2-like endophilin B2 [Source:HGNC Symbol;Acc:10834]	1273.5	-0.822629	0.294963	-2.78893	0.00528828	0.126078
ENSG00000243302			151.455	-0.827955	0.311649	-2.65669	0.00789114	0.152221
ENSG00000247828	TMEM161B-AS1	TMEM161B antisense RNA 1 [Source:HGNC Symbol;Acc:43839]	235.162	-0.831361	0.265568	-3.1305	0.00174509	0.0757834
ENSG00000111671	SPSB2	splA/ryanodine receptor domain and SOCS box containing 2 [Source:HGNC Symbol;Acc:29522]	165.19	-0.834927	0.317071	-2.63325	0.00845725	0.157035
ENSG00000210082	MT-RNR2	mitochondrially encoded 16S RNA [Source:HGNC Symbol;Acc:7471]	248227	-0.837177	0.321164	-2.6067	0.00914205	0.160918
ENSG00000242086	LINC00969	long intergenic non-protein coding RNA 969 [Source:HGNC Symbol;Acc:48729]	319.188	-0.842318	0.286619	-2.93881	0.00329475	0.104185
ENSG00000183648	NDUFB1	NADH dehydrogenase (ubiquinone) 1 beta subcomplex, 1, 7kDa [Source:HGNC Symbol;Acc:7695]	4818.89	-0.847281	0.286791	-2.95435	0.00313331	0.103149
ENSG00000131174	COX7B	cytochrome c oxidase subunit VIIb [Source:HGNC Symbol;Acc:2291]	6349.98	-0.861508	0.325692	-2.64516	0.00816521	0.154614
ENSG00000140983	RHOT2	ras homolog family member T2 [Source:HGNC Symbol;Acc:21169]	1098.78	-0.862158	0.276527	-3.1178	0.00182204	0.0768563
ENSG00000104957	CCDC130	coiled-coil domain containing 130 [Source:HGNC Symbol;Acc:28118]	401.069	-0.866583	0.268803	-3.22386	0.00126473	0.0614622
ENSG00000182796	TMEM198B	transmembrane protein 198B, pseudogene [Source:HGNC Symbol;Acc:43629]	373.438	-0.867751	0.243586	-3.5624	0.000367473	0.0293184
ENSG00000158062	UBXN11	UBX domain protein 11 [Source:HGNC Symbol;Acc:30600]	258.654	-0.874582	0.335252	-2.60873	0.00908799	0.160792
ENSG00000154079	C6orf57	chromosome 6 open reading frame 57 [Source:HGNC Symbol;Acc:20957]	173.76	-0.876471	0.335082	-2.61569	0.00890468	0.159726
ENSG00000173915	USMG5	up-regulated during skeletal muscle growth 5 homolog (mouse) [Source:HGNC Symbol;Acc:30889]	8525.72	-0.87725	0.317367	-2.76415	0.00570719	0.131164
ENSG00000178188	SH2B1	SH2B adaptor protein 1 [Source:HGNC Symbol;Acc:30417]	990.287	-0.877447	0.314309	-2.79168	0.00524358	0.125874
ENSG00000100083	GGA1	golgi-associated, gamma adaptin ear containing, ARF binding protein 1 [Source:HGNC Symbol;Acc:17842]	823.84	-0.878434	0.30268	-2.90219	0.00370564	0.1092
ENSG00000246596			111.208	-0.881293	0.322548	-2.73229	0.00628961	0.138088
ENSG00000160226	C21orf2	chromosome 21 open reading frame 2 [Source:HGNC Symbol;Acc:1260]	134.833	-0.882569	0.337388	-2.61589	0.00889961	0.159726
ENSG00000138834	MAPK8IP3	mitogen-activated protein kinase 8 interacting protein 3 [Source:HGNC Symbol;Acc:6884]	753.179	-0.883696	0.24286	-3.63871	0.00027401	0.0246953
ENSG00000226210			189.158	-0.886065	0.32396	-2.7351	0.00623608	0.137871
ENSG00000198089	SFI1	Sfi1 homolog, spindle assembly associated (yeast) [Source:HGNC Symbol;Acc:29064]	323.275	-0.892884	0.2632	-3.39241	0.000692805	0.043132
ENSG00000163795	ZNF513	zinc finger protein 513 [Source:HGNC Symbol;Acc:26498]	294.148	-0.896982	0.33758	-2.6571	0.00788168	0.152216
ENSG00000130770	ATPIF1	ATPase inhibitory factor 1 [Source:HGNC Symbol;Acc:871]	9502.45	-0.89788	0.306438	-2.93006	0.00338898	0.104677
ENSG00000130299	GTPBP3	GTP binding protein 3 (mitochondrial) [Source:HGNC Symbol;Acc:14880]	181.279	-0.898969	0.298784	-3.00876	0.00262317	0.0955586
ENSG00000196295			383.625	-0.904381	0.278105	-3.25194	0.0011462	0.0576349
ENSG00000134884	ARGLU1	arginine and glutamate rich 1 [Source:HGNC Symbol;Acc:25482]	1671.45	-0.909225	0.29545	-3.07742	0.00208798	0.0831811
ENSG00000133624	ZNF767	zinc finger family member 767 [Source:HGNC Symbol;Acc:21884]	122.912	-0.909394	0.296155	-3.07067	0.00213578	0.0844734
ENSG00000163683	SMIM14	small integral membrane protein 14 [Source:HGNC Symbol;Acc:27321]	1807.6	-0.912018	0.314455	-2.90031	0.00372792	0.109209
ENSG00000172613	RAD9A	RAD9 homolog A (S. pombe) [Source:HGNC Symbol;Acc:9827]	344.476	-0.915241	0.330047	-2.77306	0.00555313	0.129728
ENSG00000254911	SCARNA9	small Cajal body-specific RNA 9 [Source:HGNC Symbol;Acc:32566]	261.29	-0.915484	0.308809	-2.96456	0.00303112	0.101491
ENSG00000129538	RNASE1	ribonuclease, RNase A family, 1 (pancreatic) [Source:HGNC Symbol;Acc:10044]	4172.8	-0.91798	0.277674	-3.30597	0.000946491	0.0520685
ENSG00000100376	FAM118A	family with sequence similarity 118, member A [Source:HGNC Symbol;Acc:1313]	404.799	-0.922414	0.324213	-2.84509	0.00443986	0.116861
ENSG00000239569	KMT2E-AS1	KMT2E antisense RNA 1 (head to head) [Source:HGNC Symbol;Acc:40845]	139.414	-0.923321	0.347041	-2.66056	0.00780119	0.151326
ENSG00000135587	SMPD2	sphingomyelin phosphodiesterase 2, neutral membrane (neutral sphingomyelinase) [Source:HGNC Symbol;Acc:11121]	382.713	-0.929216	0.356462	-2.60677	0.00913994	0.160918
ENSG00000237037	NDUFA6-AS1	NDUFA6 antisense RNA 1 (head to head) [Source:HGNC Symbol;Acc:45273]	67.9321	-0.92983	0.347887	-2.67279	0.0075223	0.149073
ENSG00000215908	CROCCP2	ciliary rootlet coiled-coil, rootletin pseudogene 2 [Source:HGNC Symbol;Acc:28170]	271.038	-0.936681	0.306516	-3.0559	0.00224389	0.087284
ENSG00000188206	HNRNPU-AS1	HNRNPU antisense RNA 1 [Source:HGNC Symbol;Acc:27651]	257.294	-0.937958	0.315375	-2.97411	0.00293844	0.0997195
ENSG00000102901	CENPT	centromere protein T [Source:HGNC Symbol;Acc:25787]	308.067	-0.942293	0.359799	-2.61894	0.00882031	0.15951
ENSG00000099795	NDUFB7	NADH dehydrogenase (ubiquinone) 1 beta subcomplex, 7, 18kDa [Source:HGNC Symbol;Acc:7702]	3542.21	-0.945418	0.359833	-2.62738	0.00860462	0.15786
ENSG00000169592	INO80E	INO80 complex subunit E [Source:HGNC Symbol;Acc:26905]	872.131	-0.946216	0.264144	-3.5822	0.000340718	0.0284277
ENSG00000196605	ZNF846	zinc finger protein 846 [Source:HGNC Symbol;Acc:27260]	89.7077	-0.950065	0.366106	-2.59506	0.00945753	0.163504
ENSG00000164896	FASTK	Fas-activated serine/threonine kinase [Source:HGNC Symbol;Acc:24676]	1039.21	-0.951058	0.297897	-3.19257	0.00141013	0.0666396
ENSG00000265681	RPL17	ribosomal protein L17 [Source:HGNC Symbol;Acc:10307]	226.328	-0.961249	0.353431	-2.71977	0.00653281	0.139206
ENSG00000174501	ANKRD36C	ankyrin repeat domain 36C [Source:HGNC Symbol;Acc:32946]	313.114	-0.962067	0.291271	-3.303	0.000956573	0.0520685
ENSG00000106479	ZNF862	zinc finger protein 862 [Source:HGNC Symbol;Acc:34519]	136.988	-0.965773	0.330979	-2.91793	0.00352368	0.106245
ENSG00000140104	C14orf79	chromosome 14 open reading frame 79 [Source:HGNC Symbol;Acc:20126]	63.9333	-0.966093	0.365217	-2.64525	0.00816295	0.154614
ENSG00000101084	C20orf24	chromosome 20 open reading frame 24 [Source:HGNC Symbol;Acc:15870]	376.85	-0.972992	0.344889	-2.82118	0.00478475	0.12085
ENSG00000140474	ULK3	unc-51 like kinase 3 [Source:HGNC Symbol;Acc:19703]	483.107	-0.984344	0.338449	-2.9084	0.00363289	0.108743
ENSG00000198938	MT-CO3	mitochondrially encoded cytochrome c oxidase III [Source:HGNC Symbol;Acc:7422]	627116	-0.988349	0.357368	-2.76563	0.00568126	0.131164
ENSG00000108515	ENO3	enolase 3 (beta, muscle) [Source:HGNC Symbol;Acc:3354]	61.5911	-0.988631	0.373209	-2.649	0.00807303	0.154465
ENSG00000051009	FAM160A2	family with sequence similarity 160, member A2 [Source:HGNC Symbol;Acc:25378]	1081.45	-0.993385	0.34818	-2.85308	0.00432983	0.115545
ENSG00000105519	CAPS	calcyphosine [Source:HGNC Symbol;Acc:1487]	131.728	-0.996342	0.334285	-2.98052	0.00287759	0.0987447
ENSG00000250571	GLI4	GLI family zinc finger 4 [Source:HGNC Symbol;Acc:4320]	168.849	-0.996973	0.380346	-2.62123	0.00876137	0.158852
ENSG00000143643	TTC13	tetratricopeptide repeat domain 13 [Source:HGNC Symbol;Acc:26204]	330.777	-0.99775	0.365233	-2.73182	0.00629858	0.138088
ENSG00000197119	SLC25A29	solute carrier family 25 (mitochondrial carnitine/acylcarnitine carrier), member 29 [Source:HGNC Symbol;Acc:20116]	256.283	-1.00309	0.332371	-3.01798	0.00254465	0.0941367
ENSG00000260565	ERVK13-1	endogenous retrovirus group K13, member 1 [Source:HGNC Symbol;Acc:27548]	130.85	-1.00596	0.293255	-3.43033	0.000602839	0.0399302
ENSG00000147586	MRPS28	mitochondrial ribosomal protein S28 [Source:HGNC Symbol;Acc:14513]	342.632	-1.00742	0.243737	-4.13323	3.57705e-05	0.00658892
ENSG00000154358	OBSCN	obscurin, cytoskeletal calmodulin and titin-interacting RhoGEF [Source:HGNC Symbol;Acc:15719]	278.56	-1.00909	0.391547	-2.5772	0.00996055	0.166225
ENSG00000187609	EXD3	exonuclease 3'-5' domain containing 3 [Source:HGNC Symbol;Acc:26023]	420.767	-1.01511	0.393183	-2.58179	0.00982904	0.165419
ENSG00000150779	TIMM8B	translocase of inner mitochondrial membrane 8 homolog B (yeast) [Source:HGNC Symbol;Acc:11818]	2277.3	-1.02003	0.358537	-2.84498	0.00444135	0.116861
ENSG00000185324	CDK10	cyclin-dependent kinase 10 [Source:HGNC Symbol;Acc:1770]	857.532	-1.02746	0.311797	-3.29528	0.000983245	0.0524811
ENSG00000177685	EFCAB4A	EF-hand calcium binding domain 4A [Source:HGNC Symbol;Acc:28703]	990.381	-1.03096	0.339795	-3.03407	0.0024128	0.091692
ENSG00000204859	ZBTB48	zinc finger and BTB domain containing 48 [Source:HGNC Symbol;Acc:4930]	263.284	-1.03241	0.344336	-2.99826	0.00271524	0.097142
ENSG00000167302	ENTHD2	ENTH domain containing 2 [Source:HGNC Symbol;Acc:26458]	272.68	-1.04176	0.28099	-3.70745	0.000209357	0.0201534
ENSG00000124593	PRICKLE4	prickle homolog 4 (Drosophila) [Source:HGNC Symbol;Acc:16805]	87.9838	-1.04203	0.356928	-2.91943	0.00350675	0.106245
ENSG00000204839	MROH6	maestro heat-like repeat family member 6 [Source:HGNC Symbol;Acc:27814]	460.554	-1.04576	0.397547	-2.63054	0.00852506	0.157035
ENSG00000171658			86.2044	-1.04641	0.359549	-2.91035	0.00361026	0.108262
ENSG00000125967	NECAB3	N-terminal EF-hand calcium binding protein 3 [Source:HGNC Symbol;Acc:15851]	340.744	-1.05053	0.40271	-2.60865	0.00909007	0.160792
ENSG00000185522	C11orf35	chromosome 11 open reading frame 35 [Source:HGNC Symbol;Acc:28561]	97.387	-1.06032	0.37894	-2.79812	0.00514009	0.124889
ENSG00000167543	TP53I13	tumor protein p53 inducible protein 13 [Source:HGNC Symbol;Acc:25102]	475.74	-1.06337	0.323105	-3.29109	0.000998005	0.0529264
ENSG00000114378	HYAL1	hyaluronoglucosaminidase 1 [Source:HGNC Symbol;Acc:5320]	185.451	-1.06529	0.412169	-2.5846	0.00974912	0.164972
ENSG00000257815			65.0341	-1.06574	0.3895	-2.73618	0.00621562	0.137788
ENSG00000139722	VPS37B	vacuolar protein sorting 37 homolog B (S. cerevisiae) [Source:HGNC Symbol;Acc:25754]	2093.04	-1.06744	0.379136	-2.81546	0.00487069	0.121541
ENSG00000235703	LINC00894	long intergenic non-protein coding RNA 894 [Source:HGNC Symbol;Acc:48579]	98.217	-1.08	0.334499	-3.22872	0.00124345	0.0608553
ENSG00000160613	PCSK7	proprotein convertase subtilisin/kexin type 7 [Source:HGNC Symbol;Acc:8748]	1996.13	-1.08037	0.365613	-2.95496	0.00312713	0.103149
ENSG00000198712	MT-CO2	mitochondrially encoded cytochrome c oxidase II [Source:HGNC Symbol;Acc:7421]	783275	-1.08362	0.362558	-2.98881	0.00280068	0.0975647
ENSG00000131584	ACAP3	ArfGAP with coiled-coil, ankyrin repeat and PH domains 3 [Source:HGNC Symbol;Acc:16754]	399.499	-1.08713	0.286299	-3.79719	0.000146349	0.0160915
ENSG00000254469		Putative short transient receptor potential channel 2-like protein [Source:UniProtKB/Swiss-Prot;Acc:Q6ZNB5]	78.959	-1.09104	0.325897	-3.34781	0.000814529	0.0469721
ENSG00000204954	C12orf73	chromosome 12 open reading frame 73 [Source:HGNC Symbol;Acc:34450]	134.16	-1.09217	0.285482	-3.82569	0.000130406	0.014833
ENSG00000215375	MYL5	myosin, light chain 5, regulatory [Source:HGNC Symbol;Acc:7586]	174.722	-1.09698	0.348209	-3.15034	0.00163081	0.0724985
ENSG00000243716	NPIPB5	nuclear pore complex interacting protein family, member B5 [Source:HGNC Symbol;Acc:37233]	278.084	-1.10433	0.273317	-4.04047	5.33449e-05	0.00845978
ENSG00000161996	WDR90	WD repeat domain 90 [Source:HGNC Symbol;Acc:26960]	314.57	-1.10636	0.406177	-2.72383	0.00645288	0.138766
ENSG00000204282	TNRC6C-AS1	TNRC6C antisense RNA 1 [Source:HGNC Symbol;Acc:44360]	165.186	-1.10641	0.328299	-3.37012	0.000751358	0.0452758
ENSG00000197355	UAP1L1	UDP-N-acteylglucosamine pyrophosphorylase 1-like 1 [Source:HGNC Symbol;Acc:28082]	134.79	-1.1082	0.358576	-3.09055	0.00199786	0.0817636
ENSG00000161654	LSM12	LSM12 homolog (S. cerevisiae) [Source:HGNC Symbol;Acc:26407]	228.958	-1.1254	0.275438	-4.08587	4.39129e-05	0.00762373
ENSG00000099326	MZF1	myeloid zinc finger 1 [Source:HGNC Symbol;Acc:13108]	467.838	-1.12712	0.30262	-3.72453	0.000195682	0.0194331
ENSG00000167644	C19orf33	chromosome 19 open reading frame 33 [Source:HGNC Symbol;Acc:16668]	231.495	-1.128	0.393924	-2.8635	0.00418985	0.115165
ENSG00000088280	ASAP3	ArfGAP with SH3 domain, ankyrin repeat and PH domain 3 [Source:HGNC Symbol;Acc:14987]	329.799	-1.13002	0.31724	-3.56205	0.000367969	0.0293184
ENSG00000229186	ADAM1A	ADAM metallopeptidase domain 1A, pseudogene [Source:HGNC Symbol;Acc:187]	93.5475	-1.13048	0.414958	-2.72432	0.00644338	0.138766
ENSG00000141542	RAB40B	RAB40B, member RAS oncogene family [Source:HGNC Symbol;Acc:18284]	440.022	-1.13879	0.435637	-2.61407	0.00894703	0.160171
ENSG00000101473	ACOT8	acyl-CoA thioesterase 8 [Source:HGNC Symbol;Acc:15919]	388.111	-1.14104	0.410288	-2.78108	0.0054178	0.128017
ENSG00000171163	ZNF692	zinc finger protein 692 [Source:HGNC Symbol;Acc:26049]	222.155	-1.14254	0.362403	-3.15266	0.00161788	0.0721182
ENSG00000229344			224.411	-1.14406	0.381461	-2.99915	0.00270733	0.097142
ENSG00000184465	WDR27	WD repeat domain 27 [Source:HGNC Symbol;Acc:21248]	172.693	-1.14526	0.362579	-3.15866	0.00158498	0.0718163
ENSG00000131591	C1orf159	chromosome 1 open reading frame 159 [Source:HGNC Symbol;Acc:26062]	319.162	-1.14868	0.404733	-2.83813	0.00453783	0.118405
ENSG00000236144			64.4112	-1.14952	0.336866	-3.41239	0.000643956	0.04165
ENSG00000179085	DPM3	dolichyl-phosphate mannosyltransferase polypeptide 3 [Source:HGNC Symbol;Acc:3007]	1720.82	-1.15048	0.386282	-2.97835	0.00289806	0.0989602
ENSG00000205683	DPF3	D4, zinc and double PHD fingers, family 3 [Source:HGNC Symbol;Acc:17427]	139.58	-1.15309	0.369533	-3.12041	0.00180598	0.0768563
ENSG00000182841	RRP7B	ribosomal RNA processing 7 homolog B (S. cerevisiae) [Source:HGNC Symbol;Acc:30454]	99.846	-1.15331	0.398769	-2.89218	0.00382575	0.111088
ENSG00000164877	MICALL2	MICAL-like 2 [Source:HGNC Symbol;Acc:29672]	980.584	-1.15479	0.327801	-3.52283	0.000426963	0.031578
ENSG00000198556	ZNF789	zinc finger protein 789 [Source:HGNC Symbol;Acc:27801]	152.441	-1.155	0.384679	-3.00251	0.00267759	0.0966336
ENSG00000188987	HIST1H4D	histone cluster 1, H4d [Source:HGNC Symbol;Acc:4782]	753.727	-1.15552	0.434104	-2.66185	0.0077712	0.151323
ENSG00000198804	MT-CO1	mitochondrially encoded cytochrome c oxidase I [Source:HGNC Symbol;Acc:7419]	1.1232e+06	-1.15734	0.371165	-3.11813	0.00182002	0.0768563
ENSG00000002330	BAD	BCL2-associated agonist of cell death [Source:HGNC Symbol;Acc:936]	1045.8	-1.16271	0.440868	-2.63732	0.00835651	0.155909
ENSG00000179532	DNHD1	dynein heavy chain domain 1 [Source:HGNC Symbol;Acc:26532]	133.417	-1.16412	0.400587	-2.90602	0.00366055	0.108977
ENSG00000185513	L3MBTL1	l(3)mbt-like 1 (Drosophila) [Source:HGNC Symbol;Acc:15905]	70.5759	-1.16502	0.359033	-3.24489	0.00117497	0.0583697
ENSG00000252835	SCARNA21	small Cajal body-specific RNA 21 [Source:HGNC Symbol;Acc:32579]	330.078	-1.16502	0.27382	-4.2547	2.09332e-05	0.0044263
ENSG00000004059	ARF5	ADP-ribosylation factor 5 [Source:HGNC Symbol;Acc:658]	701.817	-1.16557	0.391133	-2.97998	0.0028827	0.0987447
ENSG00000187961	KLHL17	kelch-like family member 17 [Source:HGNC Symbol;Acc:24023]	103.598	-1.16731	0.408877	-2.85491	0.00430483	0.115447
ENSG00000167615	LENG8	leukocyte receptor cluster (LRC) member 8 [Source:HGNC Symbol;Acc:15500]	2653.14	-1.16991	0.286671	-4.08103	4.48375e-05	0.00770317
ENSG00000140470	ADAMTS17	ADAM metallopeptidase with thrombospondin type 1 motif, 17 [Source:HGNC Symbol;Acc:17109]	63.6778	-1.17138	0.430617	-2.72023	0.00652363	0.139206
ENSG00000211450	C11orf31	chromosome 11 open reading frame 31 [Source:HGNC Symbol;Acc:18251]	1047.54	-1.17143	0.448626	-2.61116	0.00902356	0.16041
ENSG00000188549	C15orf52	chromosome 15 open reading frame 52 [Source:HGNC Symbol;Acc:33488]	186.535	-1.17336	0.415679	-2.82275	0.00476132	0.120689
ENSG00000185189	NRBP2	nuclear receptor binding protein 2 [Source:HGNC Symbol;Acc:19339]	340.518	-1.18655	0.304166	-3.901	9.57974e-05	0.0121729
ENSG00000203306			105.775	-1.1869	0.442435	-2.68264	0.00730431	0.146024
ENSG00000204764	RANBP17	RAN binding protein 17 [Source:HGNC Symbol;Acc:14428]	62.1823	-1.19153	0.433218	-2.75041	0.00595205	0.134108
ENSG00000198744			28419.8	-1.19254	0.338748	-3.52044	0.000430838	0.0317224
ENSG00000206530	WDR52	WD repeat domain 52 [Source:HGNC Symbol;Acc:25631]	149.099	-1.19446	0.400162	-2.98495	0.00283621	0.0980663
ENSG00000258727			73.5299	-1.19462	0.435629	-2.74229	0.0061013	0.135985
ENSG00000261254			87.7654	-1.19473	0.451509	-2.64609	0.00814273	0.154594
ENSG00000005206	SPPL2B	signal peptide peptidase like 2B [Source:HGNC Symbol;Acc:30627]	1169.38	-1.19726	0.419828	-2.85179	0.00434738	0.115545
ENSG00000229180			174.742	-1.19908	0.272896	-4.39391	1.11332e-05	0.00274059
ENSG00000110583	NAA40	N(alpha)-acetyltransferase 40, NatD catalytic subunit [Source:HGNC Symbol;Acc:25845]	263.084	-1.19937	0.325914	-3.68003	0.00023321	0.0218541
ENSG00000110455	ACCS	1-aminocyclopropane-1-carboxylate synthase homolog (Arabidopsis)(non-functional) [Source:HGNC Symbol;Acc:23989]	141.504	-1.20475	0.336602	-3.57914	0.000344725	0.0284277
ENSG00000249592			98.691	-1.20602	0.355854	-3.3891	0.000701218	0.0434782
ENSG00000185485	SDHAP1	succinate dehydrogenase complex, subunit A, flavoprotein pseudogene 1 [Source:HGNC Symbol;Acc:32455]	193.499	-1.20677	0.320981	-3.75962	0.00017017	0.017777
ENSG00000250959	GLUD1P3	glutamate dehydrogenase 1 pseudogene 3 [Source:HGNC Symbol;Acc:4338]	33.0361	-1.20863	0.423773	-2.85205	0.00434376	0.115545
ENSG00000111087	GLI1	GLI family zinc finger 1 [Source:HGNC Symbol;Acc:4317]	75.6135	-1.20958	0.426861	-2.83366	0.00460183	0.118405
ENSG00000259820			68.7475	-1.21858	0.448831	-2.71502	0.00662721	0.140295
ENSG00000142794	NBPF3	neuroblastoma breakpoint family, member 3 [Source:HGNC Symbol;Acc:25076]	97.7494	-1.22048	0.34021	-3.58744	0.000333943	0.0282447
ENSG00000140264	SERF2	small EDRK-rich factor 2 [Source:HGNC Symbol;Acc:10757]	10241.6	-1.22594	0.428286	-2.86244	0.0042039	0.115165
ENSG00000261556			38.6841	-1.22625	0.432634	-2.83438	0.00459142	0.118405
ENSG00000135052	GOLM1	golgi membrane protein 1 [Source:HGNC Symbol;Acc:15451]	8065.47	-1.23666	0.442235	-2.79639	0.00516772	0.124907
ENSG00000171680	PLEKHG5	pleckstrin homology domain containing, family G (with RhoGef domain) member 5 [Source:HGNC Symbol;Acc:29105]	288.314	-1.24091	0.401399	-3.09146	0.00199172	0.0817151
ENSG00000173621	LRFN4	leucine rich repeat and fibronectin type III domain containing 4 [Source:HGNC Symbol;Acc:28456]	451.417	-1.24263	0.463091	-2.68333	0.00728923	0.146024
ENSG00000176531	PHLDB3	pleckstrin homology-like domain, family B, member 3 [Source:HGNC Symbol;Acc:30499]	187.664	-1.24502	0.324867	-3.8324	0.000126901	0.0145346
ENSG00000241484	ARHGAP8	Rho GTPase activating protein 8 [Source:HGNC Symbol;Acc:677]	42.3001	-1.25128	0.444374	-2.81582	0.00486527	0.121541
ENSG00000223705	NSUN5P1	NOP2/Sun domain family, member 5 pseudogene 1 [Source:HGNC Symbol;Acc:19146]	128.043	-1.2514	0.354446	-3.53057	0.00041467	0.0309464
ENSG00000100068	LRP5L	low density lipoprotein receptor-related protein 5-like [Source:HGNC Symbol;Acc:25323]	101.377	-1.25312	0.353905	-3.54085	0.000398842	0.030037
ENSG00000196123	KIAA0895L	KIAA0895-like [Source:HGNC Symbol;Acc:34408]	290.651	-1.26005	0.447338	-2.81677	0.00485085	0.121541
ENSG00000160318	CLDND2	claudin domain containing 2 [Source:HGNC Symbol;Acc:28511]	62.3665	-1.26116	0.389183	-3.24052	0.00119313	0.0588794
ENSG00000197061	HIST1H4C	histone cluster 1, H4c [Source:HGNC Symbol;Acc:4787]	1161.56	-1.26174	0.380451	-3.31644	0.000911735	0.0514974
ENSG00000214021	TTLL3	tubulin tyrosine ligase-like family, member 3 [Source:HGNC Symbol;Acc:24483]	212.414	-1.26745	0.373066	-3.39738	0.000680341	0.0429918
ENSG00000177576	C18orf32	chromosome 18 open reading frame 32 [Source:HGNC Symbol;Acc:31690]	49.0152	-1.27312	0.452827	-2.8115	0.00493107	0.122482
ENSG00000239779	WBP1	WW domain binding protein 1 [Source:HGNC Symbol;Acc:12737]	40.285	-1.27409	0.467792	-2.72362	0.00645713	0.138766
ENSG00000014914	MTMR11	myotubularin related protein 11 [Source:HGNC Symbol;Acc:24307]	923.268	-1.27501	0.436958	-2.91793	0.00352362	0.106245
ENSG00000099338	CATSPERG	catsper channel auxiliary subunit gamma [Source:HGNC Symbol;Acc:25243]	62.7856	-1.27558	0.408718	-3.12094	0.00180277	0.0768563
ENSG00000232559			63.1044	-1.2791	0.386969	-3.30544	0.000948257	0.0520685
ENSG00000226742	HSBP1L1	heat shock factor binding protein 1-like 1 [Source:HGNC Symbol;Acc:37243]	618.174	-1.28098	0.451591	-2.8366	0.00455967	0.118405
ENSG00000146826	C7orf43	chromosome 7 open reading frame 43 [Source:HGNC Symbol;Acc:25604]	520.584	-1.28453	0.402019	-3.19519	0.00139741	0.0666111
ENSG00000221995	TIAF1	TGFB1-induced anti-apoptotic factor 1 [Source:HGNC Symbol;Acc:11803]	57.3432	-1.28539	0.456515	-2.81565	0.00486788	0.121541
ENSG00000259001	RPPH1	ribonuclease P RNA component H1 [Source:HGNC Symbol;Acc:19273]	104434	-1.28547	0.353781	-3.63352	0.000279584	0.0247913
ENSG00000175482	POLD4	polymerase (DNA-directed), delta 4, accessory subunit [Source:HGNC Symbol;Acc:14106]	280.526	-1.28865	0.451369	-2.85498	0.0043039	0.115447
ENSG00000197774	EME2	essential meiotic structure-specific endonuclease subunit 2 [Source:HGNC Symbol;Acc:27289]	233.673	-1.29458	0.385499	-3.3582	0.000784528	0.0459446
ENSG00000181061	HIGD1A	HIG1 hypoxia inducible domain family, member 1A [Source:HGNC Symbol;Acc:29527]	5192.94	-1.30082	0.495901	-2.62315	0.00871218	0.158852
ENSG00000133247	SUV420H2	suppressor of variegation 4-20 homolog 2 (Drosophila) [Source:HGNC Symbol;Acc:28405]	128.145	-1.30771	0.441148	-2.96432	0.00303348	0.101491
ENSG00000127957	PMS2P3	postmeiotic segregation increased 2 pseudogene 3 [Source:HGNC Symbol;Acc:9128]	50.6343	-1.30887	0.407193	-3.21438	0.00130725	0.0630036
ENSG00000189045	ANKDD1B	ankyrin repeat and death domain containing 1B [Source:HGNC Symbol;Acc:32525]	55.9014	-1.30951	0.446428	-2.9333	0.00335377	0.104677
ENSG00000259120	SMIM6	small integral membrane protein 6 [Source:HGNC Symbol;Acc:40032]	142.568	-1.31224	0.503138	-2.60811	0.00910438	0.160792
ENSG00000215158			52.1294	-1.31825	0.40903	-3.22288	0.00126909	0.0614622
ENSG00000253284			32.7908	-1.31916	0.471523	-2.79765	0.00514762	0.124889
ENSG00000196391	ZNF774	zinc finger protein 774 [Source:HGNC Symbol;Acc:33108]	147.398	-1.31951	0.454576	-2.90272	0.00369937	0.1092
ENSG00000118557	PMFBP1	polyamine modulated factor 1 binding protein 1 [Source:HGNC Symbol;Acc:17728]	45.6982	-1.31975	0.496547	-2.65786	0.00786395	0.152171
ENSG00000211459	MT-RNR1	mitochondrially encoded 12S RNA [Source:HGNC Symbol;Acc:7470]	136899	-1.32031	0.355993	-3.70881	0.000208236	0.0201534
ENSG00000233483			58.3745	-1.32583	0.452582	-2.92947	0.00339541	0.104677
ENSG00000167280	ENGASE	endo-beta-N-acetylglucosaminidase [Source:HGNC Symbol;Acc:24622]	517.072	-1.33	0.344465	-3.86107	0.000112893	0.0134628
ENSG00000106133	NSUN5P2	NOP2/Sun domain family, member 5 pseudogene 2 [Source:HGNC Symbol;Acc:16609]	125.133	-1.33525	0.464063	-2.8773	0.00401094	0.113275
ENSG00000224505			23.3786	-1.34293	0.516593	-2.5996	0.00933333	0.162894
ENSG00000214135			109.572	-1.3507	0.35853	-3.76732	0.000165008	0.0175213
ENSG00000238164			578.044	-1.35192	0.351733	-3.84359	0.000121249	0.014032
ENSG00000164050	PLXNB1	plexin B1 [Source:HGNC Symbol;Acc:9103]	1033.88	-1.35229	0.471513	-2.86797	0.00413117	0.1149
ENSG00000232442			107.627	-1.35347	0.398893	-3.39306	0.000691174	0.043132
ENSG00000153902	LGI4	leucine-rich repeat LGI family, member 4 [Source:HGNC Symbol;Acc:18712]	113.422	-1.36345	0.499989	-2.72695	0.00639223	0.138766
ENSG00000260260			524.725	-1.36964	0.367053	-3.73146	0.000190373	0.0192627
ENSG00000105996	HOXA2	homeobox A2 [Source:HGNC Symbol;Acc:5103]	47.093	-1.37089	0.490294	-2.79606	0.00517299	0.124907
ENSG00000169246	NPIPB3	nuclear pore complex interacting protein family, member B3 [Source:HGNC Symbol;Acc:28989]	519.99	-1.37714	0.340303	-4.04681	5.19198e-05	0.00831372
ENSG00000235244			23.0062	-1.37981	0.524156	-2.63245	0.00847718	0.157035
ENSG00000260417			46.2399	-1.38404	0.477108	-2.90089	0.00372101	0.1092
ENSG00000255545			138.704	-1.38596	0.496456	-2.7917	0.00524317	0.125874
ENSG00000186567	CEACAM19	carcinoembryonic antigen-related cell adhesion molecule 19 [Source:HGNC Symbol;Acc:31951]	76.3715	-1.38944	0.412965	-3.36454	0.000766712	0.0455921
ENSG00000237296	SMG1P1	SMG1 pseudogene 1 [Source:HGNC Symbol;Acc:44186]	110.808	-1.39022	0.32266	-4.30863	1.64269e-05	0.00371136
ENSG00000243678	NME1-NME2	NME1-NME2 readthrough [Source:HGNC Symbol;Acc:33531]	30.2071	-1.39097	0.516331	-2.69395	0.00706101	0.14413
ENSG00000148824	MTG1	mitochondrial ribosome-associated GTPase 1 [Source:HGNC Symbol;Acc:32159]	86.3153	-1.39219	0.440407	-3.16115	0.00157147	0.0715974
ENSG00000182109			48.4402	-1.39715	0.399222	-3.49969	0.000465794	0.0336945
ENSG00000177595	PIDD	p53-induced death domain protein [Source:HGNC Symbol;Acc:16491]	207.117	-1.40486	0.391784	-3.58581	0.000336031	0.0282764
ENSG00000163993	S100P	S100 calcium binding protein P [Source:HGNC Symbol;Acc:10504]	9058.01	-1.40551	0.39623	-3.54722	0.000389327	0.0296814
ENSG00000178038	ALS2CL	ALS2 C-terminal like [Source:HGNC Symbol;Acc:20605]	389.052	-1.4066	0.506864	-2.7751	0.00551842	0.129722
ENSG00000180855	ZNF443	zinc finger protein 443 [Source:HGNC Symbol;Acc:20878]	35.0952	-1.41508	0.540518	-2.618	0.00884455	0.159726
ENSG00000260778	MIR940	microRNA 940 [Source:HGNC Symbol;Acc:33683]	36.374	-1.42264	0.546304	-2.60412	0.00921108	0.161443
ENSG00000247095	MIR210HG	MIR210 host gene (non-protein coding) [Source:HGNC Symbol;Acc:39524]	173.851	-1.42304	0.483928	-2.9406	0.00327581	0.104185
ENSG00000251791	SCARNA6	small Cajal body-specific RNA 6 [Source:HGNC Symbol;Acc:32562]	47.1245	-1.42773	0.493904	-2.89071	0.00384376	0.111415
ENSG00000131797	CLUHP3	clustered mitochondria (cluA/CLU1) homolog pseudogene 3 [Source:HGNC Symbol;Acc:28447]	148.03	-1.42895	0.334233	-4.27532	1.90867e-05	0.00408827
ENSG00000213722	DDAH2	dimethylarginine dimethylaminohydrolase 2 [Source:HGNC Symbol;Acc:2716]	369.432	-1.43023	0.535214	-2.67225	0.00753443	0.149073
ENSG00000171813	PWWP2B	PWWP domain containing 2B [Source:HGNC Symbol;Acc:25150]	588.643	-1.43151	0.528065	-2.71087	0.00671079	0.140295
ENSG00000198558	HIST1H4L	histone cluster 1, H4l [Source:HGNC Symbol;Acc:4791]	590.525	-1.44833	0.380923	-3.80217	0.000143436	0.0159844
ENSG00000174083	PIK3R6	phosphoinositide-3-kinase, regulatory subunit 6 [Source:HGNC Symbol;Acc:27101]	144.144	-1.45405	0.326581	-4.45233	8.49429e-06	0.00215533
ENSG00000272661			40.9343	-1.45476	0.469136	-3.10094	0.00192909	0.0793429
ENSG00000108511	HOXB6	homeobox B6 [Source:HGNC Symbol;Acc:5117]	706.433	-1.46434	0.443223	-3.30384	0.000953688	0.0520685
ENSG00000114023	FAM162A	family with sequence similarity 162, member A [Source:HGNC Symbol;Acc:17865]	2983.69	-1.46712	0.492013	-2.98187	0.00286494	0.0986461
ENSG00000099849	RASSF7	Ras association (RalGDS/AF-6) domain family (N-terminal) member 7 [Source:HGNC Symbol;Acc:1166]	1005.85	-1.47429	0.472822	-3.11807	0.00182038	0.0768563
ENSG00000182685	BRICD5	BRICHOS domain containing 5 [Source:HGNC Symbol;Acc:28309]	53.3406	-1.4749	0.546753	-2.69757	0.00698485	0.143671
ENSG00000225880	LINC00115	long intergenic non-protein coding RNA 115 [Source:HGNC Symbol;Acc:26211]	34.7626	-1.4783	0.559111	-2.64403	0.00819263	0.154955
ENSG00000203799	CCDC162P	coiled-coil domain containing 162, pseudogene [Source:HGNC Symbol;Acc:21565]	60.1117	-1.48267	0.453189	-3.27163	0.00106928	0.0551112
ENSG00000197182		hsa-mir-4763 [Source:miRBase;Acc:MI0017404]	198.521	-1.49033	0.267904	-5.56294	2.65264e-08	1.15131e-05
ENSG00000185864	NPIPB4	nuclear pore complex interacting protein family, member B4 [Source:HGNC Symbol;Acc:41985]	549.735	-1.49521	0.29237	-5.11409	3.15252e-07	0.000115543
ENSG00000105997	HOXA3	homeobox A3 [Source:HGNC Symbol;Acc:5104]	439.952	-1.49575	0.576581	-2.59417	0.00948198	0.163754
ENSG00000229167			18.4863	-1.49654	0.578682	-2.58612	0.00970626	0.164912
ENSG00000158106	RHPN1	rhophilin, Rho GTPase binding protein 1 [Source:HGNC Symbol;Acc:19973]	118.612	-1.50152	0.443823	-3.38315	0.00071659	0.0440655
ENSG00000188060	RAB42	RAB42, member RAS oncogene family [Source:HGNC Symbol;Acc:28702]	39.1709	-1.5023	0.472384	-3.18026	0.00147145	0.0687755
ENSG00000140398	NEIL1	nei endonuclease VIII-like 1 (E. coli) [Source:HGNC Symbol;Acc:18448]	168.769	-1.50258	0.310769	-4.83503	1.33128e-06	0.000430526
ENSG00000073350	LLGL2	lethal giant larvae homolog 2 (Drosophila) [Source:HGNC Symbol;Acc:6629]	3693.54	-1.50525	0.555865	-2.70794	0.00677032	0.140988
ENSG00000261326			53.1478	-1.50531	0.381446	-3.94632	7.93617e-05	0.0111873
ENSG00000158286	RNF207	ring finger protein 207 [Source:HGNC Symbol;Acc:32947]	118.892	-1.50636	0.399131	-3.77411	0.000160583	0.017198
ENSG00000273373			40.158	-1.50726	0.421381	-3.57696	0.00034762	0.0285238
ENSG00000185101	ANO9	anoctamin 9 [Source:HGNC Symbol;Acc:20679]	1130.71	-1.51269	0.479601	-3.15406	0.00161014	0.0721182
ENSG00000105963	ADAP1	ArfGAP with dual PH domains 1 [Source:HGNC Symbol;Acc:16486]	1038.26	-1.51285	0.47607	-3.17779	0.00148403	0.0691417
ENSG00000006025	OSBPL7	oxysterol binding protein-like 7 [Source:HGNC Symbol;Acc:16387]	507.789	-1.51331	0.500495	-3.02363	0.00249759	0.0936983
ENSG00000169432	SCN9A	sodium channel, voltage-gated, type IX, alpha subunit [Source:HGNC Symbol;Acc:10597]	172.202	-1.52146	0.537494	-2.83066	0.00464516	0.119149
ENSG00000164266	SPINK1	serine peptidase inhibitor, Kazal type 1 [Source:HGNC Symbol;Acc:11244]	19294	-1.5216	0.427479	-3.55947	0.000371601	0.0293271
ENSG00000214331			69.7291	-1.52162	0.427601	-3.55851	0.000372966	0.0293271
ENSG00000188290	HES4	hes family bHLH transcription factor 4 [Source:HGNC Symbol;Acc:24149]	265.054	-1.52637	0.567693	-2.68872	0.00717263	0.14533
ENSG00000132016	C19orf57	chromosome 19 open reading frame 57 [Source:HGNC Symbol;Acc:28153]	61.3937	-1.52897	0.563557	-2.71307	0.00666621	0.140295
ENSG00000267322			304.242	-1.52979	0.533161	-2.86928	0.00411402	0.114616
ENSG00000177191	B3GNT8	UDP-GlcNAc:betaGal beta-1,3-N-acetylglucosaminyltransferase 8 [Source:HGNC Symbol;Acc:24139]	647.044	-1.5344	0.537064	-2.85702	0.00427644	0.115343
ENSG00000165923	AGBL2	ATP/GTP binding protein-like 2 [Source:HGNC Symbol;Acc:26296]	26.2769	-1.53749	0.546091	-2.81544	0.00487108	0.121541
ENSG00000246763	RGMB-AS1	RGMB antisense RNA 1 [Source:HGNC Symbol;Acc:48666]	33.835	-1.53965	0.582827	-2.64169	0.00824932	0.155493
ENSG00000255517			62.5207	-1.54739	0.388752	-3.9804	6.87985e-05	0.0103154
ENSG00000250130			18.7759	-1.55404	0.599616	-2.59173	0.00954956	0.163972
ENSG00000130653	PNPLA7	patatin-like phospholipase domain containing 7 [Source:HGNC Symbol;Acc:24768]	165.245	-1.55751	0.472066	-3.29935	0.000969086	0.0520875
ENSG00000233930	KRTAP5-AS1	KRTAP5-1/KRTAP5-2 antisense RNA 1 [Source:HGNC Symbol;Acc:27877]	90.1956	-1.55952	0.591222	-2.63779	0.00834481	0.155867
ENSG00000175787	ZNF169	zinc finger protein 169 [Source:HGNC Symbol;Acc:12957]	42.9588	-1.56455	0.464379	-3.36912	0.000754078	0.0452758
ENSG00000075826	SEC31B	SEC31 homolog B (S. cerevisiae) [Source:HGNC Symbol;Acc:23197]	112.446	-1.56696	0.372024	-4.21199	2.53129e-05	0.0050913
ENSG00000161960	EIF4A1	eukaryotic translation initiation factor 4A1 [Source:HGNC Symbol;Acc:3282]	36.1372	-1.56744	0.436074	-3.59443	0.000325108	0.0277825
ENSG00000175772	LINC01106	long intergenic non-protein coding RNA 1106 [Source:HGNC Symbol;Acc:26769]	44.5268	-1.56804	0.567211	-2.76448	0.00570131	0.131164
ENSG00000227671	MIR3916	microRNA 3916 [Source:HGNC Symbol;Acc:38912]	133.648	-1.57283	0.436365	-3.6044	0.000312873	0.0269737
ENSG00000181619	GPR135	G protein-coupled receptor 135 [Source:HGNC Symbol;Acc:19991]	31.7289	-1.5771	0.563466	-2.79894	0.00512714	0.124889
ENSG00000248596			36.9257	-1.58304	0.52066	-3.04044	0.00236231	0.0903983
ENSG00000226310			18.4218	-1.58318	0.565354	-2.80033	0.00510505	0.124553
ENSG00000142920	ADC	arginine decarboxylase [Source:HGNC Symbol;Acc:29957]	110.922	-1.58377	0.572262	-2.76756	0.00564775	0.130696
ENSG00000079385	CEACAM1	carcinoembryonic antigen-related cell adhesion molecule 1 (biliary glycoprotein) [Source:HGNC Symbol;Acc:1814]	25988.4	-1.59991	0.606242	-2.63907	0.00831336	0.155867
ENSG00000214176	PLEKHM1P	pleckstrin homology domain containing, family M (with RUN domain) member 1 pseudogene [Source:HGNC Symbol;Acc:35411]	353.295	-1.60364	0.391892	-4.09206	4.27562e-05	0.00750189
ENSG00000196696	PDXDC2P	pyridoxal-dependent decarboxylase domain containing 2, pseudogene [Source:HGNC Symbol;Acc:27559]	47.1104	-1.60443	0.494272	-3.24604	0.00117022	0.0583697
ENSG00000237476			127.104	-1.60601	0.496353	-3.23562	0.00121379	0.0595806
ENSG00000204991	SPIRE2	spire-type actin nucleation factor 2 [Source:HGNC Symbol;Acc:30623]	537.979	-1.61163	0.560917	-2.87321	0.00406322	0.113971
ENSG00000232434	C9orf172	chromosome 9 open reading frame 172 [Source:HGNC Symbol;Acc:37284]	59.9261	-1.61388	0.588042	-2.7445	0.00606037	0.135267
ENSG00000130518	KIAA1683	KIAA1683 [Source:HGNC Symbol;Acc:29350]	257.772	-1.62061	0.285168	-5.68301	1.32344e-08	6.06318e-06
ENSG00000225151	GOLGA2P7	golgin A2 pseudogene 7 [Source:HGNC Symbol;Acc:49516]	28.0413	-1.62157	0.598078	-2.71131	0.00670178	0.140295
ENSG00000267795	SMIM22	small integral membrane protein 22 [Source:HGNC Symbol;Acc:48329]	5324.13	-1.62319	0.571701	-2.83922	0.00452237	0.118405
ENSG00000120498	TEX11	testis expressed 11 [Source:HGNC Symbol;Acc:11733]	36.0178	-1.62619	0.610478	-2.66379	0.00772655	0.151323
ENSG00000183317	EPHA10	EPH receptor A10 [Source:HGNC Symbol;Acc:19987]	504.521	-1.62669	0.543607	-2.9924	0.00276796	0.0975647
ENSG00000166762	CATSPER2	cation channel, sperm associated 2 [Source:HGNC Symbol;Acc:18810]	73.2516	-1.63014	0.45869	-3.5539	0.000379567	0.0293271
ENSG00000187091	PLCD1	phospholipase C, delta 1 [Source:HGNC Symbol;Acc:9060]	518.705	-1.63025	0.556177	-2.93117	0.00337683	0.104677
ENSG00000257084			121.769	-1.64118	0.489423	-3.3533	0.00079854	0.0462117
ENSG00000215559	ANKRD20A11P	ankyrin repeat domain 20 family, member A11, pseudogene [Source:HGNC Symbol;Acc:42024]	29.5028	-1.64177	0.544858	-3.0132	0.0025851	0.0949578
ENSG00000197576	HOXA4	homeobox A4 [Source:HGNC Symbol;Acc:5105]	24.3647	-1.6426	0.519064	-3.16455	0.00155325	0.0713993
ENSG00000115257	PCSK4	proprotein convertase subtilisin/kexin type 4 [Source:HGNC Symbol;Acc:8746]	45.0431	-1.64703	0.459899	-3.58129	0.000341898	0.0284277
ENSG00000212232	SNORD17	small nucleolar RNA, C/D box 17 [Source:HGNC Symbol;Acc:32713]	1449.7	-1.65323	0.453528	-3.64526	0.00026712	0.0242066
ENSG00000169862	CTNND2	catenin (cadherin-associated protein), delta 2 [Source:HGNC Symbol;Acc:2516]	51.1786	-1.66305	0.429393	-3.87303	0.00010749	0.0132301
ENSG00000180902	D2HGDH	D-2-hydroxyglutarate dehydrogenase [Source:HGNC Symbol;Acc:28358]	449.308	-1.6731	0.493202	-3.39233	0.000693021	0.043132
ENSG00000257298			37.7576	-1.67503	0.535711	-3.12675	0.00176749	0.0763119
ENSG00000145103	ILDR1	immunoglobulin-like domain containing receptor 1 [Source:HGNC Symbol;Acc:28741]	264.036	-1.67715	0.624101	-2.68731	0.00720294	0.145441
ENSG00000136883	KIF12	kinesin family member 12 [Source:HGNC Symbol;Acc:21495]	252.878	-1.68082	0.615345	-2.73151	0.0063045	0.138088
ENSG00000106006	HOXA6	homeobox A6 [Source:HGNC Symbol;Acc:5107]	67.733	-1.68134	0.595085	-2.82538	0.00472242	0.120196
ENSG00000106278	PTPRZ1	protein tyrosine phosphatase, receptor-type, Z polypeptide 1 [Source:HGNC Symbol;Acc:9685]	15.852	-1.68513	0.634648	-2.65522	0.00792574	0.152709
ENSG00000167702	KIFC2	kinesin family member C2 [Source:HGNC Symbol;Acc:29530]	414.931	-1.694	0.46584	-3.63644	0.000276429	0.024778
ENSG00000235316	DUSP8P5	dual specificity phosphatase 8 pseudogene 5 [Source:HGNC Symbol;Acc:45003]	47.1699	-1.6984	0.444841	-3.81799	0.000134541	0.0150951
ENSG00000271420			37.366	-1.70001	0.589458	-2.88403	0.00392627	0.112424
ENSG00000105755	ETHE1	ethylmalonic encephalopathy 1 [Source:HGNC Symbol;Acc:23287]	5915.97	-1.70187	0.580733	-2.93056	0.0033835	0.104677
ENSG00000258469	CHMP4BP1	charged multivesicular body protein 4B pseudogene 1 [Source:HGNC Symbol;Acc:43616]	21.398	-1.70322	0.615179	-2.76865	0.00562888	0.130573
ENSG00000121900	TMEM54	transmembrane protein 54 [Source:HGNC Symbol;Acc:24143]	10256.5	-1.70821	0.557394	-3.06464	0.0021793	0.0855791
ENSG00000185168	LINC00482	long intergenic non-protein coding RNA 482 [Source:HGNC Symbol;Acc:26816]	50.3263	-1.70944	0.628748	-2.71881	0.0065518	0.139251
ENSG00000237111	IGHJ3P	immunoglobulin heavy joining 3P (pseudogene) [Source:HGNC Symbol;Acc:5537]	55.1999	-1.71075	0.562197	-3.04298	0.00234249	0.0900577
ENSG00000183604			37.8004	-1.71436	0.641225	-2.67356	0.00750498	0.149073
ENSG00000229348	HYI-AS1	HYI antisense RNA 1 [Source:HGNC Symbol;Acc:41173]	24.7536	-1.72019	0.575191	-2.99065	0.00278388	0.0975647
ENSG00000267940			23.6166	-1.72072	0.628193	-2.73916	0.00615959	0.136905
ENSG00000186301	MST1P2	macrophage stimulating 1 (hepatocyte growth factor-like) pseudogene 2 [Source:HGNC Symbol;Acc:7383]	73.6203	-1.7213	0.601905	-2.85975	0.00423974	0.115165
ENSG00000180747			153.856	-1.72603	0.349014	-4.94544	7.59737e-07	0.000255721
ENSG00000243679			69.9976	-1.7265	0.563134	-3.06588	0.00217034	0.0854304
ENSG00000123159	GIPC1	GIPC PDZ domain containing family, member 1 [Source:HGNC Symbol;Acc:1226]	4751.56	-1.73516	0.672965	-2.57837	0.00992663	0.166213
ENSG00000215513	PI4KAP1	phosphatidylinositol 4-kinase, catalytic, alpha pseudogene 1 [Source:HGNC Symbol;Acc:33576]	51.1663	-1.73705	0.546218	-3.18015	0.001472	0.0687755
ENSG00000101049	SGK2	serum/glucocorticoid regulated kinase 2 [Source:HGNC Symbol;Acc:13900]	525.344	-1.74412	0.660066	-2.64234	0.00823346	0.155371
ENSG00000225138			194.053	-1.75047	0.370765	-4.72124	2.34415e-06	0.000702947
ENSG00000145113	MUC4	mucin 4, cell surface associated [Source:HGNC Symbol;Acc:7514]	30488.6	-1.7616	0.635232	-2.77316	0.0055514	0.129728
ENSG00000242607	RPS3AP34	ribosomal protein S3a pseudogene 34 [Source:HGNC Symbol;Acc:36293]	16.4688	-1.76656	0.680179	-2.5972	0.00939873	0.163464
ENSG00000217930	PAM16	presequence translocase-associated motor 16 homolog (S. cerevisiae) [Source:HGNC Symbol;Acc:29679]	35.2508	-1.76729	0.57828	-3.05611	0.00224229	0.087284
ENSG00000146013	GFRA3	GDNF family receptor alpha 3 [Source:HGNC Symbol;Acc:4245]	69.9982	-1.77262	0.650888	-2.72338	0.00646167	0.138766
ENSG00000186704	DTX2P1	deltex homolog 2 pseudogene 1 [Source:HGNC Symbol;Acc:42352]	180.465	-1.77544	0.316635	-5.6072	2.05625e-08	9.16586e-06
ENSG00000272523	LINC01023	long intergenic non-protein coding RNA 1023 [Source:HGNC Symbol;Acc:49004]	41.0889	-1.77855	0.510402	-3.4846	0.000492878	0.0347395
ENSG00000203697	CAPN8	calpain 8 [Source:HGNC Symbol;Acc:1485]	710.47	-1.78247	0.503161	-3.54254	0.0003963	0.0299825
ENSG00000184925	LCN12	lipocalin 12 [Source:HGNC Symbol;Acc:28733]	37.3491	-1.79485	0.537348	-3.34019	0.000837198	0.0479441
ENSG00000134398	ERN2	endoplasmic reticulum to nucleus signaling 2 [Source:HGNC Symbol;Acc:16942]	1875.01	-1.80509	0.616071	-2.93	0.00338961	0.104677
ENSG00000254827	SLC22A18AS	solute carrier family 22 (organic cation transporter), member 18 antisense [Source:HGNC Symbol;Acc:10965]	701.691	-1.81393	0.55533	-3.2664	0.00108924	0.0557916
ENSG00000203392		Uncharacterized protein; cDNA FLJ12988 fis, clone NT2RP3000080 [Source:UniProtKB/TrEMBL;Acc:Q9H960]	18.2945	-1.82045	0.648632	-2.8066	0.00500671	0.123422
ENSG00000092067	CEBPE	CCAAT/enhancer binding protein (C/EBP), epsilon [Source:HGNC Symbol;Acc:1836]	70.9621	-1.82499	0.618952	-2.94851	0.00319307	0.103691
ENSG00000137259	HIST1H2AB	histone cluster 1, H2ab [Source:HGNC Symbol;Acc:4734]	277.301	-1.82603	0.358413	-5.09476	3.49183e-07	0.000125197
ENSG00000177943	MAMDC4	MAM domain containing 4 [Source:HGNC Symbol;Acc:24083]	239.221	-1.84619	0.474105	-3.89405	9.8585e-05	0.0123179
ENSG00000215788	TNFRSF25	tumor necrosis factor receptor superfamily, member 25 [Source:HGNC Symbol;Acc:11910]	291.181	-1.84776	0.460828	-4.00965	6.08085e-05	0.00920106
ENSG00000152763	WDR78	WD repeat domain 78 [Source:HGNC Symbol;Acc:26252]	131.688	-1.85163	0.515738	-3.59025	0.000330359	0.0280857
ENSG00000146205	ANO7	anoctamin 7 [Source:HGNC Symbol;Acc:31677]	367.403	-1.85447	0.716596	-2.58788	0.00965674	0.164912
ENSG00000229155			43.5133	-1.85479	0.707566	-2.62137	0.00875769	0.158852
ENSG00000228544	CCDC183-AS1	CCDC183 antisense RNA 1 [Source:HGNC Symbol;Acc:44105]	43.3005	-1.85493	0.499344	-3.71474	0.000203415	0.0198516
ENSG00000204174	NPY4R	neuropeptide Y receptor Y4 [Source:HGNC Symbol;Acc:9329]	90.5665	-1.85532	0.681191	-2.72365	0.00645654	0.138766
ENSG00000214530	STARD10	StAR-related lipid transfer (START) domain containing 10 [Source:HGNC Symbol;Acc:10666]	4554.07	-1.85565	0.663771	-2.79561	0.00518017	0.124907
ENSG00000234769	WASH4P	WAS protein family homolog 4 pseudogene [Source:HGNC Symbol;Acc:14126]	11.5296	-1.86506	0.717618	-2.59895	0.00935089	NA
ENSG00000237883	DGUOK-AS1	DGUOK antisense RNA 1 [Source:HGNC Symbol;Acc:43441]	49.4891	-1.86508	0.708358	-2.63296	0.00846449	0.157035
ENSG00000262877			45.2824	-1.87373	0.452887	-4.13731	3.51405e-05	0.00658892
ENSG00000233041	PHGR1	proline/histidine/glycine-rich 1 [Source:HGNC Symbol;Acc:37226]	79801.4	-1.87581	0.679294	-2.76142	0.0057551	0.131649
ENSG00000122756	CNTFR	ciliary neurotrophic factor receptor [Source:HGNC Symbol;Acc:2170]	99.0106	-1.89506	0.661398	-2.86523	0.0041671	0.115165
ENSG00000133317	LGALS12	lectin, galactoside-binding, soluble, 12 [Source:HGNC Symbol;Acc:15788]	28.4982	-1.89637	0.712063	-2.66321	0.00774002	0.151323
ENSG00000114859	CLCN2	chloride channel, voltage-sensitive 2 [Source:HGNC Symbol;Acc:2020]	670.408	-1.89782	0.69661	-2.72437	0.00644249	0.138766
ENSG00000067191	CACNB1	calcium channel, voltage-dependent, beta 1 subunit [Source:HGNC Symbol;Acc:1401]	209.654	-1.89914	0.62259	-3.05038	0.00228553	0.0882794
ENSG00000262370			22.7023	-1.90011	0.731878	-2.59622	0.00942561	0.163464
ENSG00000188747	NOXA1	NADPH oxidase activator 1 [Source:HGNC Symbol;Acc:10668]	376.202	-1.91714	0.451141	-4.24955	2.14203e-05	0.00447195
ENSG00000234771			960.441	-1.91761	0.588375	-3.25917	0.00111739	0.0565164
ENSG00000137825	ITPKA	inositol-trisphosphate 3-kinase A [Source:HGNC Symbol;Acc:6178]	489.171	-1.92655	0.674507	-2.85623	0.004287	0.115343
ENSG00000212694			146.252	-1.93275	0.400574	-4.82496	1.40032e-06	0.000444144
ENSG00000266010	GATA6-AS1	GATA6 antisense RNA 1 (head to head) [Source:HGNC Symbol;Acc:48840]	98.3592	-1.93315	0.54225	-3.56505	0.000363792	0.0292684
ENSG00000170075	GPR37L1	G protein-coupled receptor 37 like 1 [Source:HGNC Symbol;Acc:14923]	41.6093	-1.93383	0.699651	-2.76398	0.00571002	0.131164
ENSG00000213145	CRIP1	cysteine-rich protein 1 (intestinal) [Source:HGNC Symbol;Acc:2360]	39.0082	-1.93402	0.452308	-4.27589	1.90374e-05	0.00408827
ENSG00000103355	PRSS33	protease, serine, 33 [Source:HGNC Symbol;Acc:30405]	44.6946	-1.93553	0.732251	-2.64326	0.00821128	0.15513
ENSG00000179698	KIAA1875	KIAA1875 [Source:HGNC Symbol;Acc:26959]	31.9103	-1.93954	0.499078	-3.88625	0.000101806	0.0126247
ENSG00000264462	MIR3648	microRNA 3648 [Source:HGNC Symbol;Acc:38941]	631.625	-1.9513	0.684346	-2.85133	0.00435361	0.115545
ENSG00000273451			12.6058	-1.95132	0.696971	-2.79972	0.00511469	NA
ENSG00000229719	MIR194-2	microRNA 194-2 [Source:HGNC Symbol;Acc:31565]	473.69	-1.95675	0.528839	-3.7001	0.000215517	0.0205464
ENSG00000164825	DEFB1	defensin, beta 1 [Source:HGNC Symbol;Acc:2766]	199.948	-1.97475	0.512801	-3.85092	0.000117677	0.0137649
ENSG00000119042	SATB2	SATB homeobox 2 [Source:HGNC Symbol;Acc:21637]	2763.68	-1.97634	0.760208	-2.59974	0.00932955	0.162894
ENSG00000225828	FAM229A	family with sequence similarity 229, member A [Source:HGNC Symbol;Acc:44652]	90.0881	-1.98139	0.436665	-4.53755	5.69105e-06	0.00151391
ENSG00000139865	TTC6	tetratricopeptide repeat domain 6 [Source:HGNC Symbol;Acc:19739]	28.5662	-1.98154	0.699356	-2.83338	0.0046059	0.118405
ENSG00000203943	SAMD13	sterile alpha motif domain containing 13 [Source:HGNC Symbol;Acc:24582]	219.438	-1.98315	0.683047	-2.90339	0.00369147	0.1092
ENSG00000231806	PCAT7	prostate cancer associated transcript 7 (non-protein coding) [Source:HGNC Symbol;Acc:48824]	24.077	-1.98542	0.763998	-2.59873	0.00935703	0.163135
ENSG00000247011			26.1687	-1.98545	0.711931	-2.78883	0.00528988	0.126078
ENSG00000127249	ATP13A4	ATPase type 13A4 [Source:HGNC Symbol;Acc:25422]	71.8329	-1.98688	0.559578	-3.55068	0.000384244	0.029476
ENSG00000069812	HES2	hes family bHLH transcription factor 2 [Source:HGNC Symbol;Acc:16005]	308.053	-1.98693	0.716471	-2.77322	0.00555043	0.129728
ENSG00000139044	B4GALNT3	beta-1,4-N-acetyl-galactosaminyl transferase 3 [Source:HGNC Symbol;Acc:24137]	1321.17	-1.99379	0.670072	-2.97548	0.00292532	0.099479
ENSG00000147437	GNRH1	gonadotropin-releasing hormone 1 (luteinizing-releasing hormone) [Source:HGNC Symbol;Acc:4419]	27.7477	-1.9953	0.637218	-3.13126	0.00174057	0.0757834
ENSG00000258498	DIO3OS	DIO3 opposite strand/antisense RNA (head to head) [Source:HGNC Symbol;Acc:20348]	93.6417	-1.99753	0.451668	-4.42257	9.75341e-06	0.00243732
ENSG00000162069	CCDC64B	coiled-coil domain containing 64B [Source:HGNC Symbol;Acc:33584]	1241.52	-2.0021	0.645355	-3.10233	0.00192005	0.0791686
ENSG00000089356	FXYD3	FXYD domain containing ion transport regulator 3 [Source:HGNC Symbol;Acc:4027]	26443	-2.00665	0.687597	-2.91836	0.0035188	0.106245
ENSG00000080493	SLC4A4	solute carrier family 4 (sodium bicarbonate cotransporter), member 4 [Source:HGNC Symbol;Acc:11030]	2362.98	-2.01379	0.770599	-2.61328	0.00896786	0.160171
ENSG00000272214			133.853	-2.02054	0.688166	-2.93612	0.00332343	0.104433
ENSG00000205147			13.2635	-2.02074	0.694051	-2.91151	0.00359681	NA
ENSG00000158315	RHBDL2	rhomboid, veinlet-like 2 (Drosophila) [Source:HGNC Symbol;Acc:16083]	407.783	-2.02369	0.744007	-2.71998	0.00652853	0.139206
ENSG00000196436	NPIPB15	nuclear pore complex interacting protein family, member B15 [Source:HGNC Symbol;Acc:34409]	139.095	-2.02507	0.668223	-3.03054	0.0024412	0.0920644
ENSG00000151882	CCL28	chemokine (C-C motif) ligand 28 [Source:HGNC Symbol;Acc:17700]	1917.35	-2.02878	0.677344	-2.9952	0.00274261	0.0975647
ENSG00000143416	SELENBP1	selenium binding protein 1 [Source:HGNC Symbol;Acc:10719]	6740.83	-2.02887	0.78236	-2.59326	0.00950698	0.163844
ENSG00000172367	PDZD3	PDZ domain containing 3 [Source:HGNC Symbol;Acc:19891]	393.743	-2.03085	0.58536	-3.46941	0.000521606	0.0361675
ENSG00000196553	LINC00238	long intergenic non-protein coding RNA 238 [Source:HGNC Symbol;Acc:20100]	57.8128	-2.03148	0.753645	-2.69555	0.00702732	0.143977
ENSG00000161714	PLCD3	phospholipase C, delta 3 [Source:HGNC Symbol;Acc:9061]	2092.45	-2.03464	0.64479	-3.15551	0.00160216	0.0720013
ENSG00000238105	GOLGA2P5	golgin A2 pseudogene 5 [Source:HGNC Symbol;Acc:25315]	200.947	-2.03619	0.521256	-3.90631	9.37152e-05	0.0121704
ENSG00000213971			52.2597	-2.04705	0.544511	-3.75943	0.0001703	0.017777
ENSG00000166816	LDHD	lactate dehydrogenase D [Source:HGNC Symbol;Acc:19708]	650.592	-2.05301	0.721776	-2.84439	0.0044497	0.116861
ENSG00000267796	LIN37	lin-37 homolog (C. elegans) [Source:HGNC Symbol;Acc:33234]	24.543	-2.06108	0.622555	-3.31068	0.0009307	0.0516836
ENSG00000223823			33.3091	-2.07368	0.672367	-3.08414	0.00204139	0.0825211
ENSG00000250067	YJEFN3	YjeF N-terminal domain containing 3 [Source:HGNC Symbol;Acc:24785]	63.8075	-2.07597	0.495885	-4.18639	2.83426e-05	0.00563198
ENSG00000143630	HCN3	hyperpolarization activated cyclic nucleotide-gated potassium channel 3 [Source:HGNC Symbol;Acc:19183]	116.144	-2.0847	0.60335	-3.45521	0.00054987	0.0374038
ENSG00000261208			20.6114	-2.08718	0.585002	-3.56782	0.000359962	0.0291022
ENSG00000119227	PIGZ	phosphatidylinositol glycan anchor biosynthesis, class Z [Source:HGNC Symbol;Acc:30596]	779.014	-2.08968	0.758395	-2.7554	0.00586208	0.132611
ENSG00000261664			42.4975	-2.10028	0.789501	-2.66026	0.00780804	0.151326
ENSG00000106992	AK1	adenylate kinase 1 [Source:HGNC Symbol;Acc:361]	150.12	-2.11102	0.610995	-3.45505	0.000550198	0.0374038
ENSG00000235545			13.566	-2.11229	0.656753	-3.21626	0.00129872	NA
ENSG00000196660	SLC30A10	solute carrier family 30, member 10 [Source:HGNC Symbol;Acc:25355]	131.491	-2.11542	0.767852	-2.75498	0.0058695	0.132611
ENSG00000259444			34.3522	-2.12004	0.6759	-3.13662	0.00170909	0.0749679
ENSG00000196196	HRCT1	histidine rich carboxyl terminus 1 [Source:HGNC Symbol;Acc:33872]	1047.18	-2.12177	0.615569	-3.44684	0.000567175	0.0378721
ENSG00000004777	ARHGAP33	Rho GTPase activating protein 33 [Source:HGNC Symbol;Acc:23085]	162.722	-2.12425	0.502496	-4.2274	2.36406e-05	0.0048738
ENSG00000233006			48.7275	-2.12623	0.545201	-3.89991	9.62296e-05	0.0121729
ENSG00000255367			22.1947	-2.13761	0.68462	-3.12233	0.00179424	0.0768563
ENSG00000146039	SLC17A4	solute carrier family 17, member 4 [Source:HGNC Symbol;Acc:10932]	462.944	-2.14507	0.677129	-3.1679	0.00153546	0.0709365
ENSG00000110723	EXPH5	exophilin 5 [Source:HGNC Symbol;Acc:30578]	945.639	-2.15762	0.744659	-2.89745	0.00376204	0.109818
ENSG00000147852	VLDLR	very low density lipoprotein receptor [Source:HGNC Symbol;Acc:12698]	75.3752	-2.15865	0.803296	-2.68724	0.00720459	0.145441
ENSG00000265337			21.5139	-2.16326	0.69587	-3.10871	0.00187903	0.0784579
ENSG00000269896			22.675	-2.17697	0.647346	-3.36291	0.000771248	0.0455921
ENSG00000204616	TRIM31	tripartite motif containing 31 [Source:HGNC Symbol;Acc:16289]	176.051	-2.19028	0.649703	-3.3712	0.000748421	0.0452758
ENSG00000272610	MAGI1-IT1	MAGI1 intronic transcript 1 (non-protein coding) [Source:HGNC Symbol;Acc:42436]	10.2322	-2.19302	0.816928	-2.68447	0.00726441	NA
ENSG00000238045			240.313	-2.19799	0.533092	-4.12311	3.73799e-05	0.00670116
ENSG00000184313	MROH7	maestro heat-like repeat family member 7 [Source:HGNC Symbol;Acc:24802]	22.2652	-2.21156	0.700847	-3.15556	0.00160192	0.0720013
ENSG00000253582			20.6416	-2.21276	0.82377	-2.68614	0.00722833	0.145564
ENSG00000186188	FFAR4	free fatty acid receptor 4 [Source:HGNC Symbol;Acc:19061]	904.489	-2.23085	0.839425	-2.65759	0.00787012	0.152171
ENSG00000213420	GPC2	glypican 2 [Source:HGNC Symbol;Acc:4450]	23.9193	-2.25564	0.790372	-2.8539	0.00431867	0.115545
ENSG00000185275	CD24P4	CD24 molecule pseudogene 4 [Source:HGNC Symbol;Acc:1649]	4389.43	-2.26146	0.649683	-3.48087	0.000499785	0.0349278
ENSG00000017621	MAGIX	MAGI family member, X-linked [Source:HGNC Symbol;Acc:30006]	127.967	-2.26873	0.66306	-3.42161	0.000622521	0.040743
ENSG00000180861	C12orf36	chromosome 12 open reading frame 36 [Source:HGNC Symbol;Acc:26598]	339.476	-2.27434	0.750589	-3.03008	0.00244493	0.0920644
ENSG00000147614	ATP6V0D2	ATPase, H transporting, lysosomal 38kDa, V0 subunit d2 [Source:HGNC Symbol;Acc:18266]	33.1545	-2.29458	0.847859	-2.70632	0.00680341	0.141143
ENSG00000254815			28.5137	-2.30132	0.740861	-3.10628	0.00189457	0.0787081
ENSG00000142515	KLK3	kallikrein-related peptidase 3 [Source:HGNC Symbol;Acc:6364]	35.7603	-2.30654	0.673153	-3.42647	0.000611485	0.0401802
ENSG00000152292	SH2D6	SH2 domain containing 6 [Source:HGNC Symbol;Acc:30439]	55.0699	-2.31561	0.774499	-2.98981	0.00279147	0.0975647
ENSG00000237840	FAM21FP	family with sequence similarity 21, member F, pseudogene [Source:HGNC Symbol;Acc:45011]	10.5937	-2.31956	0.800044	-2.89929	0.00374012	NA
ENSG00000241388	HNF1A-AS1	HNF1A antisense RNA 1 [Source:HGNC Symbol;Acc:26785]	232.622	-2.3392	0.662828	-3.52912	0.000416938	0.0309755
ENSG00000226812			72.4492	-2.36194	0.775187	-3.04693	0.00231192	0.0890899
ENSG00000267804			224.342	-2.3625	0.54278	-4.3526	1.34531e-05	0.00321569
ENSG00000159409	CELF3	CUGBP, Elav-like family member 3 [Source:HGNC Symbol;Acc:11967]	48.3288	-2.37497	0.840288	-2.82637	0.00470785	0.120196
ENSG00000273066			41.2108	-2.37508	0.654987	-3.62615	0.000287679	0.0253727
ENSG00000260671			7.20149	-2.37831	0.909839	-2.61399	0.0089492	NA
ENSG00000207590	MIR215	microRNA 215 [Source:HGNC Symbol;Acc:31592]	167.22	-2.38624	0.794417	-3.00376	0.00266665	0.0964498
ENSG00000176563	CNTD1	cyclin N-terminal domain containing 1 [Source:HGNC Symbol;Acc:26847]	15.3807	-2.39064	0.78054	-3.0628	0.00219277	0.0859036
ENSG00000176927	EFCAB5	EF-hand calcium binding domain 5 [Source:HGNC Symbol;Acc:24801]	34.2781	-2.39584	0.568252	-4.21616	2.48496e-05	0.0050598
ENSG00000085552	IGSF9	immunoglobulin superfamily, member 9 [Source:HGNC Symbol;Acc:18132]	587.993	-2.40353	0.769165	-3.12485	0.00177895	0.0766063
ENSG00000250073			77.6763	-2.41307	0.614806	-3.92493	8.67536e-05	0.0116327
ENSG00000148600	CDHR1	cadherin-related family member 1 [Source:HGNC Symbol;Acc:14550]	1070.28	-2.42431	0.909393	-2.66585	0.00767935	0.151042
ENSG00000196408	NOXO1	NADPH oxidase organizer 1 [Source:HGNC Symbol;Acc:19404]	301.937	-2.42688	0.730795	-3.32087	0.000897359	0.0508596
ENSG00000128886	ELL3	elongation factor RNA polymerase II-like 3 [Source:HGNC Symbol;Acc:23113]	19.3832	-2.43823	0.801598	-3.04171	0.00235241	0.0902285
ENSG00000223573	TINCR	tissue differentiation-inducing non-protein coding RNA [Source:HGNC Symbol;Acc:14607]	51.1946	-2.45585	0.83286	-2.9487	0.00319114	0.103691
ENSG00000205364	MT1M	metallothionein 1M [Source:HGNC Symbol;Acc:14296]	148.384	-2.46136	0.605383	-4.06579	4.78691e-05	0.0080279
ENSG00000269352			70.8167	-2.46219	0.532478	-4.62403	3.76361e-06	0.001089
ENSG00000244274	DBNDD2	dysbindin (dystrobrevin binding protein 1) domain containing 2 [Source:HGNC Symbol;Acc:15881]	86.1894	-2.47439	0.74978	-3.30016	0.000966303	0.0520875
ENSG00000010310	GIPR	gastric inhibitory polypeptide receptor [Source:HGNC Symbol;Acc:4271]	133.858	-2.48102	0.632044	-3.92538	8.65915e-05	0.0116327
ENSG00000253958	CLDN23	claudin 23 [Source:HGNC Symbol;Acc:17591]	42.073	-2.48339	0.960448	-2.58565	0.00971945	0.164912
ENSG00000237424	FOXD2-AS1	FOXD2 antisense RNA 1 (head to head) [Source:HGNC Symbol;Acc:44256]	143.803	-2.49125	0.741923	-3.35783	0.000785568	0.0459446
ENSG00000240990	HOXA11-AS	HOXA11 antisense RNA [Source:HGNC Symbol;Acc:24957]	183.394	-2.49799	0.93115	-2.68269	0.0073032	0.146024
ENSG00000272840			14.1154	-2.5274	0.914652	-2.76324	0.00572304	NA
ENSG00000266949	LYPD8	LY6/PLAUR domain containing 8 [Source:HGNC Symbol;Acc:44208]	1992.04	-2.54412	0.827642	-3.07394	0.00211254	0.0837553
ENSG00000224020	MIR181A2HG	MIR181A2 host gene (non-protein coding) [Source:HGNC Symbol;Acc:37188]	11.6065	-2.54513	0.829756	-3.06733	0.0021598	NA
ENSG00000183396	TMEM89	transmembrane protein 89 [Source:HGNC Symbol;Acc:32372]	9.31442	-2.55105	0.888887	-2.86994	0.00410555	NA
ENSG00000153303	FRMD1	FERM domain containing 1 [Source:HGNC Symbol;Acc:21240]	229.146	-2.55258	0.717955	-3.55536	0.000377469	0.0293271
ENSG00000262903			14.7295	-2.55767	0.948155	-2.69753	0.00698568	NA
ENSG00000240498	CDKN2B-AS1	CDKN2B antisense RNA 1 [Source:HGNC Symbol;Acc:34341]	786.603	-2.58369	0.851513	-3.03424	0.00241146	0.091692
ENSG00000016602	CLCA4	chloride channel accessory 4 [Source:HGNC Symbol;Acc:2018]	9483.82	-2.58677	0.896784	-2.88449	0.00392043	0.112424
ENSG00000156966	B3GNT7	UDP-GlcNAc:betaGal beta-1,3-N-acetylglucosaminyltransferase 7 [Source:HGNC Symbol;Acc:18811]	6943.16	-2.59593	0.959049	-2.70677	0.00679406	0.141143
ENSG00000255337			12.9904	-2.60532	0.870918	-2.99146	0.00277644	NA
ENSG00000225285			16.8606	-2.61773	0.803027	-3.25982	0.00111482	0.0565164
ENSG00000258593			14.4017	-2.62173	0.846879	-3.09576	0.00196312	NA
ENSG00000203401			107.327	-2.62777	0.956413	-2.74753	0.00600469	0.134893
ENSG00000174562	KLK15	kallikrein-related peptidase 15 [Source:HGNC Symbol;Acc:20453]	127.727	-2.63488	0.921506	-2.85932	0.00424547	0.115165
ENSG00000250942	ENPP7P11	ectonucleotide pyrophosphatase/phosphodiesterase 7 pseudogene 11 [Source:HGNC Symbol;Acc:48694]	13.0687	-2.63819	0.73187	-3.60473	0.000312481	NA
ENSG00000200959	SNORA74A	small nucleolar RNA, H/ACA box 74A [Source:HGNC Symbol;Acc:10119]	10.5013	-2.6416	0.971404	-2.71936	0.00654077	NA
ENSG00000254512			10.106	-2.64832	0.890188	-2.97501	0.00292976	NA
ENSG00000110887	DAO	D-amino-acid oxidase [Source:HGNC Symbol;Acc:2671]	52.2061	-2.66221	0.905353	-2.94052	0.00327659	0.104185
ENSG00000160408	ST6GALNAC6	ST6 (alpha-N-acetyl-neuraminyl-2,3-beta-galactosyl-1,3)-N-acetylgalactosaminide alpha-2,6-sialyltransferase 6 [Source:HGNC Symbol;Acc:23364]	2420.67	-2.66327	0.972443	-2.73874	0.00616747	0.136905
ENSG00000249007			11.5453	-2.69819	0.974437	-2.76897	0.00562331	NA
ENSG00000101746	NOL4	nucleolar protein 4 [Source:HGNC Symbol;Acc:7870]	16.0658	-2.70044	0.97719	-2.76347	0.00571901	0.131187
ENSG00000011083	SLC6A7	solute carrier family 6 (neurotransmitter transporter), member 7 [Source:HGNC Symbol;Acc:11054]	84.0411	-2.70651	0.659322	-4.10499	4.04326e-05	0.00717047
ENSG00000211766	TRBJ2-2P	T cell receptor beta joining 2-2P (non-functional) [Source:HGNC Symbol;Acc:12170]	11.417	-2.70782	1.03709	-2.61097	0.00902853	NA
ENSG00000007952	NOX1	NADPH oxidase 1 [Source:HGNC Symbol;Acc:7889]	1114.44	-2.71118	0.971122	-2.7918	0.0052416	0.125874
ENSG00000203400			63.4675	-2.71671	0.595752	-4.56013	5.11218e-06	0.00142907
ENSG00000188373	C10orf99	chromosome 10 open reading frame 99 [Source:HGNC Symbol;Acc:31428]	7380.66	-2.72821	0.92449	-2.95104	0.00316707	0.103691
ENSG00000213213	CCDC183	coiled-coil domain containing 183 [Source:HGNC Symbol;Acc:28236]	18.3522	-2.74728	0.873653	-3.14459	0.00166322	0.0733461
ENSG00000186564	FOXD2	forkhead box D2 [Source:HGNC Symbol;Acc:3803]	427.888	-2.78256	0.839423	-3.31484	0.000916945	0.051559
ENSG00000166415	WDR72	WD repeat domain 72 [Source:HGNC Symbol;Acc:26790]	11.7127	-2.7982	0.915054	-3.05797	0.00222843	NA
ENSG00000174514	MFSD4	major facilitator superfamily domain containing 4 [Source:HGNC Symbol;Acc:25433]	541.25	-2.80415	0.860598	-3.25837	0.00112053	0.0565164
ENSG00000087250	MT3	metallothionein 3 [Source:HGNC Symbol;Acc:7408]	29.5713	-2.82128	0.906471	-3.11238	0.00185587	0.0778851
ENSG00000104140	RHOV	ras homolog family member V [Source:HGNC Symbol;Acc:18313]	121.69	-2.86185	0.840578	-3.40463	0.000662549	0.0421908
ENSG00000259392			7.21266	-2.88303	1.02669	-2.80807	0.00498398	NA
ENSG00000137561	TTPA	tocopherol (alpha) transfer protein [Source:HGNC Symbol;Acc:12404]	30.4043	-2.8849	1.1166	-2.58366	0.00977594	0.165199
ENSG00000124939	SCGB2A1	secretoglobin, family 2A, member 1 [Source:HGNC Symbol;Acc:7051]	226.97	-2.91405	0.906754	-3.21372	0.00131027	0.0630036
ENSG00000214999			9.76157	-2.91881	0.847715	-3.44316	0.000574967	NA
ENSG00000210195	MT-TT	mitochondrially encoded tRNA threonine [Source:HGNC Symbol;Acc:7499]	111.066	-2.92476	1.06674	-2.74177	0.00611095	0.136016
ENSG00000184619	KRBA2	KRAB-A domain containing 2 [Source:HGNC Symbol;Acc:26989]	18.6445	-2.92624	0.819381	-3.57127	0.000355248	0.0289578
ENSG00000271200			10.6374	-2.9289	1.00122	-2.92533	0.00344089	NA
ENSG00000273319			25.0134	-2.93062	1.05617	-2.77477	0.0055241	0.129722
ENSG00000263603			10.4579	-2.97235	0.998163	-2.97782	0.00290307	NA
ENSG00000225946			552.87	-2.99657	0.724441	-4.13639	3.52811e-05	0.00658892
ENSG00000019102	VSIG2	V-set and immunoglobulin domain containing 2 [Source:HGNC Symbol;Acc:17149]	2282.53	-3.00907	0.856536	-3.51307	0.000442968	0.0324706
ENSG00000125207	PIWIL1	piwi-like RNA-mediated gene silencing 1 [Source:HGNC Symbol;Acc:9007]	19.985	-3.01025	1.1094	-2.7134	0.00665961	0.140295
ENSG00000231435			8.805	-3.04577	0.989301	-3.07871	0.002079	NA
ENSG00000165496	RPL10L	ribosomal protein L10-like [Source:HGNC Symbol;Acc:17976]	17.5421	-3.06246	0.959918	-3.19033	0.00142109	0.0669658
ENSG00000091138	SLC26A3	solute carrier family 26 (anion exchanger), member 3 [Source:HGNC Symbol;Acc:3018]	13607.7	-3.09761	0.941527	-3.28998	0.00100193	0.0529644
ENSG00000272141			301.284	-3.12604	0.652892	-4.78799	1.68457e-06	0.000514513
ENSG00000224961			89.4607	-3.13188	0.788328	-3.97281	7.10282e-05	0.0105538
ENSG00000155850	SLC26A2	solute carrier family 26 (anion exchanger), member 2 [Source:HGNC Symbol;Acc:10994]	4842.97	-3.13322	0.812271	-3.85736	0.000114619	0.013503
ENSG00000095110	NXPE1	neurexophilin and PC-esterase domain family, member 1 [Source:HGNC Symbol;Acc:28527]	1981.14	-3.24253	0.859087	-3.77439	0.000160397	0.017198
ENSG00000228222			47.133	-3.24296	1.1878	-2.73023	0.00632908	0.138442
ENSG00000207554	MIR647	microRNA 647 [Source:HGNC Symbol;Acc:32903]	9.13994	-3.29687	1.10978	-2.97073	0.00297088	NA
ENSG00000166183	ASPG	asparaginase homolog (S. cerevisiae) [Source:HGNC Symbol;Acc:20123]	74.7288	-3.29705	0.98251	-3.35574	0.000791515	0.0459664
ENSG00000112183	RBM24	RNA binding motif protein 24 [Source:HGNC Symbol;Acc:21539]	90.3869	-3.29803	1.10475	-2.98532	0.00283284	0.0980663
ENSG00000205923	CEMP1	cementum protein 1 [Source:HGNC Symbol;Acc:32553]	5.51443	-3.30218	1.14168	-2.89238	0.0038233	NA
ENSG00000213204	C6orf165	chromosome 6 open reading frame 165 [Source:HGNC Symbol;Acc:21405]	8.18574	-3.37378	1.23243	-2.73751	0.00619061	NA
ENSG00000235049	LINC00940	long intergenic non-protein coding RNA 940 [Source:HGNC Symbol;Acc:48634]	15.81	-3.37962	1.2244	-2.76023	0.00577601	0.131762
ENSG00000160471	COX6B2	cytochrome c oxidase subunit VIb polypeptide 2 (testis) [Source:HGNC Symbol;Acc:24380]	84.9042	-3.39149	0.924525	-3.66836	0.000244115	0.022619
ENSG00000150667	FSIP1	fibrous sheath interacting protein 1 [Source:HGNC Symbol;Acc:21674]	23.7405	-3.39353	1.14403	-2.9663	0.00301403	0.101491
ENSG00000199023	MIR339	microRNA 339 [Source:HGNC Symbol;Acc:31776]	5.504	-3.43695	1.27595	-2.69365	0.00706737	NA
ENSG00000183397	C19orf71	chromosome 19 open reading frame 71 [Source:HGNC Symbol;Acc:34496]	8.92217	-3.45024	1.08916	-3.1678	0.00153596	NA
ENSG00000142959	BEST4	bestrophin 4 [Source:HGNC Symbol;Acc:17106]	650.208	-3.45121	1.05545	-3.26989	0.00107589	0.0552791
ENSG00000205358	MT1H	metallothionein 1H [Source:HGNC Symbol;Acc:7400]	688.532	-3.45194	0.970718	-3.55607	0.000376445	0.0293271
ENSG00000183773	AIFM3	apoptosis-inducing factor, mitochondrion-associated, 3 [Source:HGNC Symbol;Acc:26398]	437.679	-3.49413	0.905254	-3.85984	0.000113462	0.0134628
ENSG00000104267	CA2	carbonic anhydrase II [Source:HGNC Symbol;Acc:1373]	8910.37	-3.49577	0.886528	-3.94322	8.0396e-05	0.011237
ENSG00000156564	LRFN2	leucine rich repeat and fibronectin type III domain containing 2 [Source:HGNC Symbol;Acc:21226]	13.89	-3.55576	1.24783	-2.84956	0.004378	NA
ENSG00000113249	HAVCR1	hepatitis A virus cellular receptor 1 [Source:HGNC Symbol;Acc:17866]	155.402	-3.56627	1.10668	-3.2225	0.00127076	0.0614622
ENSG00000198976	MIR429	microRNA 429 [Source:HGNC Symbol;Acc:13784]	19.3362	-3.57854	1.0062	-3.55649	0.00037584	0.0293271
ENSG00000267274			7.7253	-3.58063	1.29602	-2.76278	0.00573109	NA
ENSG00000210107	MT-TQ	mitochondrially encoded tRNA glutamine [Source:HGNC Symbol;Acc:7495]	103.68	-3.62013	0.706298	-5.1255	2.96746e-07	0.000111233
ENSG00000234828			32.9642	-3.6346	0.894286	-4.06425	4.81879e-05	0.0080279
ENSG00000268743			5.5022	-3.66378	1.30124	-2.81561	0.00486849	NA
ENSG00000265142	MIR133A1	microRNA 1-2 [Source:HGNC Symbol;Acc:31500]	4.69494	-3.67546	1.39381	-2.63698	0.00836473	NA
ENSG00000168748	CA7	carbonic anhydrase VII [Source:HGNC Symbol;Acc:1381]	1494.51	-3.753	1.08717	-3.45209	0.000556267	0.0374038
ENSG00000168447	SCNN1B	sodium channel, non-voltage-gated 1, beta subunit [Source:HGNC Symbol;Acc:10600]	2858.48	-3.81158	0.923212	-4.1286	3.64977e-05	0.0066149
ENSG00000239614	HMGN1P7	high mobility group nucleosome binding domain 1 pseudogene 7 [Source:HGNC Symbol;Acc:39350]	4.50382	-3.81729	1.47415	-2.58949	0.00961176	NA
ENSG00000132915	PDE6A	phosphodiesterase 6A, cGMP-specific, rod, alpha [Source:HGNC Symbol;Acc:8785]	49.127	-3.82947	1.09248	-3.50532	0.000456067	0.0331361
ENSG00000232874			7.16629	-3.84514	1.45861	-2.63616	0.00838495	NA
ENSG00000225953	SATB2-AS1	SATB2 antisense RNA 1 [Source:HGNC Symbol;Acc:26490]	386.787	-3.87663	0.870378	-4.45396	8.43002e-06	0.00215533
ENSG00000133710	SPINK5	serine peptidase inhibitor, Kazal type 5 [Source:HGNC Symbol;Acc:15464]	1329.5	-3.8911	1.07517	-3.61906	0.000295674	0.0259391
ENSG00000232626			7.09363	-3.89273	1.2455	-3.12544	0.00177538	NA
ENSG00000239205			21.6626	-3.9428	1.05614	-3.73322	0.000189047	0.0192467
ENSG00000147588	PMP2	peripheral myelin protein 2 [Source:HGNC Symbol;Acc:9117]	13.0099	-4.11521	1.36603	-3.01253	0.0025908	NA
ENSG00000183034	OTOP2	otopetrin 2 [Source:HGNC Symbol;Acc:19657]	833.342	-4.11522	1.04197	-3.94946	7.83277e-05	0.0111367
ENSG00000238246			21.2307	-4.14728	1.10605	-3.74964	0.000177089	0.0182284
ENSG00000225421			16.2619	-4.20905	1.19964	-3.50858	0.000450502	0.0328767
ENSG00000167434	CA4	carbonic anhydrase IV [Source:HGNC Symbol;Acc:1375]	3192.36	-4.20945	1.0615	-3.96555	7.32277e-05	0.010688
ENSG00000169752	NRG4	neuregulin 4 [Source:HGNC Symbol;Acc:29862]	22.1896	-4.28401	1.19986	-3.57041	0.00035642	0.0289578
ENSG00000235026	DPP10-AS1	DPP10 antisense RNA 1 [Source:HGNC Symbol;Acc:40941]	45.6877	-4.31318	1.23608	-3.48939	0.000484116	0.0346366
ENSG00000137634	NXPE4	neurexophilin and PC-esterase domain family, member 4 [Source:HGNC Symbol;Acc:23117]	2237.23	-4.31907	0.995341	-4.33929	1.42947e-05	0.00332059
ENSG00000166165	CKB	creatine kinase, brain [Source:HGNC Symbol;Acc:1991]	15069.3	-4.33362	1.57201	-2.75674	0.00583811	0.132582
ENSG00000101958	GLRA2	glycine receptor, alpha 2 [Source:HGNC Symbol;Acc:4327]	25.0617	-4.3392	1.17861	-3.68161	0.000231765	0.0218428
ENSG00000109182	CWH43	cell wall biogenesis 43 C-terminal homolog (S. cerevisiae) [Source:HGNC Symbol;Acc:26133]	216.926	-4.51473	1.57328	-2.86963	0.00410956	0.114616
ENSG00000207607	MIR200A	microRNA 200a [Source:HGNC Symbol;Acc:31578]	16.5925	-4.57635	1.13024	-4.04902	5.14318e-05	0.00831372
ENSG00000218048			6.96493	-4.65085	1.74603	-2.66367	0.0077293	NA
ENSG00000106038	EVX1	even-skipped homeobox 1 [Source:HGNC Symbol;Acc:3506]	7.90779	-4.76226	1.71981	-2.76905	0.00562193	NA
ENSG00000255186			4.44513	-4.76915	1.83232	-2.60279	0.00924691	NA
ENSG00000184809	C21orf88	chromosome 21 open reading frame 88 [Source:HGNC Symbol;Acc:16424]	452.784	-4.77256	1.61477	-2.95557	0.00312089	0.103149
ENSG00000207944	MIR574	microRNA 574 [Source:HGNC Symbol;Acc:32830]	4.58641	-4.82545	1.79248	-2.69204	0.00710155	NA
ENSG00000242798			4.43364	-4.82605	1.83967	-2.62332	0.00870777	NA
ENSG00000232694			11.3464	-4.87008	1.5955	-3.05239	0.00227027	NA
ENSG00000133742	CA1	carbonic anhydrase I [Source:HGNC Symbol;Acc:1368]	18355.4	-5.35561	1.50725	-3.55323	0.000380524	0.0293271
ENSG00000007306	CEACAM7	carcinoembryonic antigen-related cell adhesion molecule 7 [Source:HGNC Symbol;Acc:1819]	18744.9	-5.39431	1.02544	-5.26049	1.4367e-07	5.64177e-05
ENSG00000253508			20.5277	-5.60381	1.64568	-3.40516	0.000661256	0.0421908
ENSG00000259735			6.82132	-5.81519	2.02266	-2.87502	0.00404008	NA
ENSG00000239345	HNRNPA1P26	heterogeneous nuclear ribonucleoprotein A1 pseudogene 26 [Source:HGNC Symbol;Acc:39544]	22.0328	-6.01148	1.45083	-4.14348	3.4207e-05	0.00656019
ENSG00000071203	MS4A12	membrane-spanning 4-domains, subfamily A, member 12 [Source:HGNC Symbol;Acc:13370]	3166.97	-6.83856	1.0955	-6.24238	4.30953e-10	2.29281e-07
ENSG00000182816	KRTAP13-2	keratin associated protein 13-2 [Source:HGNC Symbol;Acc:18923]	34.0387	-6.96566	2.27065	-3.06769	0.00215722	0.0851172
ENSG00000103375	AQP8	aquaporin 8 [Source:HGNC Symbol;Acc:642]	2355.54	-8.78202	1.6842	-5.21437	1.84448e-07	7.07465e-05
ENSG00000156284	CLDN8	claudin 8 [Source:HGNC Symbol;Acc:2050]	364.075	-8.91108	3.00735	-2.9631	0.00304559	0.101682
ENSG00000172410	INSL5	insulin-like 5 [Source:HGNC Symbol;Acc:6088]	2353.69	-9.309	2.36777	-3.93155	8.43997e-05	0.0115226
